# Supplementary material for: Onset of three-centre, four-electron bonding in peri-substituted acenaphthenes: A structural and computational investigation
Source: Royal Society of Chemistry journal article supplement (doi:10.1039/c1dt11697e), 2011-12-16
Supplement: c1dt11697e.pdf [file c1dt11697e.pdf]

# Supporting Information

## Onset of Three-Centre, Four-Electron Bonding in *peri*-Substituted

### Acenaphthenes:

### A Structural and Computational Investigation

5 Lara K. Aschenbach, Fergus R. Knight, Rebecca A. M. Randall, David B. Cordes, Alex Baggott, Michael Bühl, Alexandra M. Z. Slawin, and J. Derek Woollins\*

#### 1. Experimental Section

All experiments were carried out under an oxygen- and moisture-free nitrogen atmosphere using standard Schlenk  
10 techniques and glassware. Reagents were obtained from commercial sources and used as received. Dry solvents were  
collected from a MBraun solvent system. Elemental analyses were performed by the University of St. Andrews School of  
Chemistry Microanalysis Service. Infra-red spectra were recorded as KBr discs in the range 4000-300 cm<sup>-1</sup> on a Perkin-  
Elmer System 2000 Fourier transform spectrometer. <sup>1</sup>H and <sup>13</sup>C NMR spectra were recorded on a Jeol GSX 270 MHz  
spectrometer with δ(H) and δ(C) referenced to external tetramethylsilane. <sup>77</sup>Se and <sup>125</sup>Te NMR spectra were recorded on a  
15 Jeol GSX 270 MHz spectrometer with δ(Se) and δ(Te) referenced to external dimethylselenide and diphenyl ditelluride  
respectively. Assignments of <sup>13</sup>C and <sup>1</sup>H NMR spectra were made with the help of H-H COSY and HSQC experiments. All  
measurements were performed at 25 °C. All values reported for NMR spectroscopy are in parts per million (ppm).  
Coupling constants (*J*) are given in Hertz (Hz). Mass spectrometry was performed by the University of St. Andrews Mass  
Spectrometry Service. Electron impact mass spectrometry (EIMS) and Chemical Ionisation Mass Spectrometry (CIMS)  
20 was carried out on a Micromass GCT orthogonal acceleration time of flight mass spectrometer. Electrospray Mass  
Spectrometry (ESMS) was carried out on a Micromass LCT orthogonal accelerator time of flight mass spectrometer. 5,6-  
dibromoacenaphthene **A13**<sup>1,2,3</sup> and 5,6-diiodoacenaphthene **A14** were prepared following standard literature procedures  
starting from acenaphthene and 5,6-dibromoacenaphthene respectively.

25 **5-Bromo-6-(phenylsulfanyl)acenaphthene [Acenap(Br)(SPh)] (A1):** *Synthesis of A1 from A13:* A solution of *n*-  
butyllithium (2.5 M) in hexane (3.85 mL, 9.62 mmol) was added dropwise to a solution of 5,6-dibromoacenaphthene  
(3.002 g, 9.62 mmol) in diethyl ether (40 mL) at -78°C. The mixture was stirred at this temperature for 1 h, after which a  
solution of diphenyl disulfide (2.100 g, 9.62 mmol) in diethyl ether (30 mL) was added dropwise. The resulting mixture  
was stirred at -78°C for a further 1 h, then washed with 0.1 N sodium hydroxide (3 x 60 mL). The organic layer was dried  
30 with magnesium sulfate and concentrated under reduced pressure affording a yellow solid. Addition of hexane afforded the  
product as a white precipitate which was collected by filtration and recrystallised by diffusion of hexane into a saturated  
solution of the compound in dichloromethane to give colourless crystals (2.8 g, 87 %); mp 108-110 °C; elemental analysis  
(Found C, 63.3, H 3.7. Calc. for C<sub>18</sub>H<sub>13</sub>BrS: C 63.35; H, 3.8 %); IR (KBr disk): ν<sub>max</sub> cm<sup>-1</sup> 2918s, 2825w, 1597vs, 1579vs,  
1562s, 1486s, 1475vs, 1436vs, 1417s, 1406s, 1321vs, 1256s, 1229s, 1204w, 1197w, 1107s, 1081vs, 1069s, 1024vs, 996s,  
35 944w, 864s, 839vs, 813vs, 733vs, 687vs, 625s, 603s, 507s, 492s, 466s, 459s, 407w; δ<sub>H</sub>(270 MHz; CDCl<sub>3</sub>, 25 °C; Me<sub>4</sub>Si)  
7.68 (1 H, d, <sup>3</sup>J<sub>HH</sub> 7.4 Hz, Acenap 4-H), 7.52 (1 H, d, <sup>3</sup>J<sub>HH</sub> 7.3 Hz, Acenap 7-H), 7.20-7.11 (3 H, m, Acenap 8-H, *SPh*  
12,16-H), 7.11-7.02 (4 H, m, Acenap 3-H, *SPh* 13,15-H), 3.33-3.22 (4 H, m, 2 x CH<sub>2</sub>); δ<sub>C</sub>(67.9 MHz; CDCl<sub>3</sub>; 25 °C;

Me<sub>4</sub>Si) 148.2(q), 147.0(q), 141.9(q), 139.2(q), 137.8(s), 135.5(s), 130.1(q), 129.1(s), 126.7(q), 125.9(s), 120.90s), 120.6(s), 114.5(q), 30.2(s, CH<sub>2</sub>), 30.0(s, CH<sub>2</sub>); MS (EI<sup>+</sup>): *m/z* 341.95 (M<sup>+</sup>, 25 %), 260.15 (100, M - Br).

**5-Bromo-6-(phenylselanyl)acenaphthene [Acenap(Br)(SePh) (A2)]:** *Synthesis of A2 from A13:* A solution of *n*-butyllithium (2.5 M) in hexane (2.7 mL, 6.76 mmol) was added dropwise to a solution of 5,6-dibromoacenaphthene (1.054 g, 3.378 mmol) in diethyl ether (40 mL) at -78 °C. The mixture was stirred at this temperature for 1 h, after which a solution of diphenyl diselenide (2.109 g, 6.76 mmol) in diethyl ether (30 mL) was added dropwise. The resulting mixture was stirred at -78 °C for a further 1 h, then washed with 0.1 N sodium hydroxide (2 x 60 mL). The organic layer was dried with magnesium sulfate and concentrated under reduced pressure affording an orange oil. Addition of hexane afforded the product as a white precipitate which was collected by filtration and recrystallised from dichloromethane to give colourless crystals (0.9 g, 66 %); mp 77-78 °C; elemental analysis (Found C, 56.05; H, 3.2. Calc. for C<sub>18</sub>H<sub>13</sub>BrSe: C, 55.7; H, 3.4 %); IR (KBr disk):  $\nu_{\max}$  cm<sup>-1</sup> 3039w, 2915s, 2822w, 2341w, 1953w, 1886w, 1829w, 1759w, 1651w, 1597s, 1556s, 1470w, 1434s, 1408s, 1344w, 1328s, 1300s, 1248s, 1230s, 1196w, 1173w, 1150w, 1106s, 1060w, 1044w, 1015s, 995s, 969w, 912w, 832vs, 809vs, 740vs, 698vs, 688vs, 600s, 538w, 504w, 473s, 461s, 396w;  $\delta_{\text{H}}$ (270 MHz, CDCl<sub>3</sub>, 25 °C, Me<sub>4</sub>Si) 7.59 (1 H, d, <sup>3</sup>*J*<sub>HH</sub> 7.4 Hz, Acenap 4-H), 7.54-7.45 (2 H, m, SePh 12-16-H), 7.30-7.19 (3H, m, SePh 13-15-H), 7.10 (1 H, d, <sup>3</sup>*J*<sub>HH</sub> 7.4 Hz, Acenap 7-H), 6.95 (1 H, d, <sup>3</sup>*J*<sub>HH</sub> 7.4 Hz, Acenap 3-H), 6.87 (1 H, d, <sup>3</sup>*J*<sub>HH</sub> 7.4 Hz, Acenap 8-H), 3.15 (4 H, s, 2 x CH<sub>2</sub>);  $\delta_{\text{C}}$ (67.9 MHz; CDCl<sub>3</sub>; 25 °C; Me<sub>4</sub>Si) 146.8(q), 145.7(q), 142.0(q), 135.7(s), 134.2(s), 133.0(s), 132.0(q), 130.1(q), 129.7(s), 128.3(s), 126.5(q), 120.8(s), 120.6(s), 115.4(q), 30.1(s, CH<sub>2</sub>), 29.9(s, CH<sub>2</sub>);  $\delta_{\text{Se}}$ (51.5 MHz; CDCl<sub>3</sub>; 25 °C; PhSeSePh) 423.7(s); MS (EI<sup>+</sup>): *m/z* 387.94 (M<sup>+</sup>, 100 %).

20

**5-Bromo-6-(phenyltelluro)acenaphthene [Acenap(Br)(TePh) (A3)]:** *Synthesis of A3 from A13:* A solution of *n*-butyllithium (2.5 M) in hexane (2.9 mL, 9.7 mmol) was added dropwise to a solution of 5,6-dibromoacenaphthene (2.026 g, 9.7 mmol) in diethyl ether (40 mL) at -78 °C. The mixture was stirred at this temperature for 1 h, after which a solution of diphenyl ditelluride (3.971 g, 9.7 mmol) in diethyl ether (30 mL) was added dropwise. The resulting mixture was stirred at -78 °C for a further 1 h, then washed with 0.1 N sodium hydroxide (3 x 60 mL). The organic layer was dried with magnesium sulfate and concentrated under reduced pressure affording a yellow oil. Addition of hexane afforded the product as a yellow precipitate which was collected by filtration and recrystallised by diffusion of hexane into a saturated solution of the compound in dichloromethane to give yellow crystals (0.7 g, 53 %); mp 135-137 °C; elemental analysis (Found: C, 49.6; H, 2.8. Calc. for C<sub>18</sub>H<sub>13</sub>BrTe: C, 49.5; H, 3.0 %); IR (KBr disk):  $\nu_{\max}$  cm<sup>-1</sup> 2923s, 2839w, 1825w, 1602s, 1555s, 1472w, 1434s, 1408s, 1347w, 1328s, 1250w, 1229s, 1112w, 1097s, 1062w, 1039s, 1014s, 996s, 982w, 913w, 832vs, 803vs, 733vs, 693vs, 598s, 534w, 489w, 456s;  $\delta_{\text{H}}$ (270 MHz; CDCl<sub>3</sub>; 25 °C; Me<sub>4</sub>Si) 7.91-7.83 (2 H, m, TePh 12,16-H), 7.58 (1 H, d, <sup>4</sup>*J*<sub>HH</sub> 7.4 Hz, Acenap 4-H), 7.41-7.33 (1 H, m, TePh 14-H), 7.31-7.22 (2 H, m, TePh 13,15-H), 7.17 (1 H, d, <sup>3</sup>*J*<sub>HH</sub> 7.4 Hz, Acenap 7-H), 6.99 (1 H, d, <sup>3</sup>*J*<sub>HH</sub> 7.4 Hz, Acenap 3-H), 6.81 (1 H, d, <sup>3</sup>*J*<sub>HH</sub> 7.4 Hz, Acenap 8-H), 3.18 (4 H, s, 2 x CH<sub>2</sub>);  $\delta_{\text{C}}$ (67.9 MHz; CDCl<sub>3</sub>; 25 °C; Me<sub>4</sub>Si) 147.6(q), 146.1(q), 142.5(q), 141.8(s), 136.0(s), 133.6(s), 132.9(q), 130.4(s), 129.3(s), 121.9(s), 120.9(s), 119.4(q), 117.3(q), 30.4(s, CH<sub>2</sub>), 30.2(s, CH<sub>2</sub>);  $\delta_{\text{Te}}$ (81.2 MHz; CDCl<sub>3</sub>; 25 °C; PhTeTePh) 696.0(s); MS (ES<sup>+</sup>): *m/z* 468.89 (100 %, M + OMe).

**5-Iodo-6-(phenylsulfanyl)acenaphthene [Acenap(I)(SPh) (A4)]:** *Synthesis of A4 from A1:* A solution of *n*-butyllithium (2.5 M) in hexane (1.07 mL, 2.66 mmol) was added dropwise to a solution of 5-bromo-6-(phenylsulfanyl)acenaphthene

(0.909 g, 2.66 mmol) in diethyl ether (30 mL) at -78 °C. The mixture was stirred at this temperature for 1 h, after which a solution of iodine (0.676 g, 2.66 mmol) in diethyl ether (30 mL) was added dropwise whilst the temperature of the mixture was maintained between -10-0 °C. The resulting mixture was stirred at -10 °C for 1/2 h and for a further 1 h without cooling. Aqueous 5% sodium thiosulfate (60 mL) was added to the mixture with vigorous stirring. The organic layer was washed with aqueous sodium thiosulfate and then water, dried with magnesium sulfate and concentrated under reduced pressure affording a cream solid. The crude solid was recrystallised by diffusion of hexane into a saturated solution of the compound in dichloromethane to give the product as colourless crystals (0.8 g, 76 %); mp 92-94 °C; elemental analysis (Found: C, 55.7; H, 3.0. Calc. for C<sub>18</sub>H<sub>13</sub>IS: C, 55.7, H, 3.4 %); IR (KBr disk):  $\nu_{\max}$  cm<sup>-1</sup> 2919s, 2819w, 1936w, 1872w, 1789w, 1722w, 1654w, 1595s, 1578vs, 1474vs, 1434vs, 1415s, 1403s, 1360w, 1341w, 1318vs, 1268w, 1254w, 1228s, 1202s, 1178w, 1150w, 1105s, 1078s, 1022s, 998w, 941w, 894w, 858s, 837vs, 811s, 733vs, 685vs, 624s, 598s, 478w, 463s, 401w;  $\delta_{\text{H}}$ (270 MHz; CDCl<sub>3</sub>; 25 °C; Me<sub>4</sub>Si) 8.12 (1 H, d, <sup>3</sup>J<sub>HH</sub> 7.4 Hz, Acenap 4-H), 7.71 (1 H, d, <sup>3</sup>J<sub>HH</sub> 7.2 Hz, Acenap 7-H), 7.19 (1 H, d, <sup>3</sup>J<sub>HH</sub> 7.2 Hz, Acenap 8-H), 7.17-7.09 (2 H, m, SPh 13,15-H), 7.07-7.00 (1 H, m, SPh 14-H), 6.98-6.93 (2 H, m, SPh 12,16-H), 6.91 (1 H, d, <sup>3</sup>J<sub>HH</sub> 7.4 Hz, Acenap 3-H), 3.39-3.20 (4 H, m, 2 x CH<sub>2</sub>);  $\delta_{\text{C}}$ (67.9 MHz; CDCl<sub>3</sub>; 25 °C; Me<sub>4</sub>Si) 150.2(q), 148.5(q), 144.8(s), 141.5(q), 140.8(q), 140.4(s), 132.5(q), 129.4(s), 128.1(s), 126.2(q), 125.7(s), 122.2(s), 120.9(s), 85.4(q), 30.6(s, CH<sub>2</sub>), 30.5(s, CH<sub>2</sub>); MS (ES<sup>+</sup>): *m/z* 410.98 (40 %, M + Na).

*Synthesis of A4 from A14:* A solution of *n*-butyllithium (2.5 M) in hexane (0.52 mL, 1.29 mmol) was added dropwise to a solution of 5,6-diiodoacenaphthene (0.525 g, 1.29 mmol) in diethyl ether (30 mL) at -78 °C. The mixture was stirred at this temperature for 1 h, after which a solution of diphenyl disulfide (0.282 g, 1.29 mmol) in diethyl ether (20 mL) was added dropwise. The resulting mixture was stirred at -78 °C for a further 1 h, then washed with 0.1 N sodium hydroxide (3 x 40 mL). The organic layer was dried with magnesium sulfate and concentrated under reduced pressure affording a yellow oil. The crude compound was purified by column chromatography on silica gel (hexane) and the resulting yellow solid was recrystallised by diffusion of hexane into a saturated solution of the compound in dichloromethane to give the product as colourless crystals (0.3 g, 55 %).

25

**5-Iodo-6-(phenylselanyl)acenaphthene [Acenap(I)(SePh)] (A5):** *Synthesis of A5 from A2:* A solution of *n*-butyllithium (2.5 M) in hexane (1.10 mL, 2.74 mmol) was added dropwise to a solution of 5-bromo-6-(phenylselanyl)acenaphthene (1.065 g, 2.74 mmol) in diethyl ether (30 mL) at -78 °C. The mixture was stirred at this temperature for 1 h, after which a solution of iodine (0.695 g, 2.74 mmol) in diethyl ether (30 mL) was added dropwise whilst the temperature of the mixture was maintained between -10-0 °C. The resulting mixture was stirred at -10 °C for 1/2 h and for a further 1 h without cooling. Aqueous 5% sodium thiosulfate (60 mL) was added to the mixture with vigorous stirring. The organic layer was washed with aqueous sodium thiosulfate and then water, dried with magnesium sulfate and concentrated under reduced pressure affording a cream solid. The crude solid was purified by column chromatography on silica gel (hexane) and the resulting yellow crystalline solid was recrystallised by diffusion of hexane into a saturated solution of the compound in dichloromethane to give the product as colourless crystals (0.7 g, 60 %); mp 82-84 °C; elemental analysis (Found: C, 49.7; H, 2.7. Calc. for C<sub>18</sub>H<sub>13</sub>ISe: C, 49.7; H, 3.0 %); IR (KBr disk):  $\nu_{\max}$  cm<sup>-1</sup> 2914s, 2867w, 2824w, 1971w, 1950w, 1898w, 1874w, 1860w, 1803w, 1651w, 1597w, 1552w, 1472s, 1434s, 1403s, 1339w, 1320s, 1299w, 1270w, 1249s, 1230s, 1157w, 1105s, 1062w, 1015s, 1000s, 967w, 953w, 936w, 915w, 835vs, 809vs, 738vs, 690s, 598s, 536w, 498w, 463s, 385w, 363w;  $\delta_{\text{H}}$ (270 MHz; CDCl<sub>3</sub>; 25 °C; Me<sub>4</sub>Si) 8.00 (1 H, d, <sup>3</sup>J<sub>HH</sub> 7.4 Hz, Acenap 4-H), 7.42-7.33 (2 H, m, SePh 12,16-H), 7.31 (1 H,

d,  $^3J_{\text{HH}}$  7.4 Hz, Acenap 7-H), 7.22-7.14 (3 H, m, SePh 13-15-H), 6.90 (1 H, d,  $^3J_{\text{HH}}$  7.4 Hz, Acenap 8-H), 6.81 (1 H, d,  $^3J_{\text{HH}}$  7.4 Hz, Acenap 3-H), 3.21-3.08 (4 H, m, 2 x CH<sub>2</sub>);  $\delta_{\text{C}}$ (67.9 MHz; CDCl<sub>3</sub>; 25 °C; Me<sub>4</sub>Si) 148.3(q), 147.5(q), 143.5(s), 141.8(q), 135.9(s), 134.7(s), 134.2(q), 133.2(q), 130.0(s), 128.1(s), 126.6(q), 122.0(s), 121.2(s), 86.9(q), 30.5(s, CH<sub>2</sub>), 30.3(s, CH<sub>2</sub>);  $\delta_{\text{Se}}$ (51.5 MHz; CDCl<sub>3</sub>; 25 °C; PhSeSePh) 400.9(s); MS (ES<sup>+</sup>): *m/z* 435.91 (3 %, M + H), 308.01 (100, M - I).

5

*Synthesis of A5 from A14*: A solution of *n*-butyllithium (2.5 M) in hexane (0.58 mL, 1.45 mmol) was added dropwise to a solution of 5,6-diiodoacenaphthene (0.589 g, 1.45 mmol) in diethyl ether (30 mL) at -78 °C. The mixture was stirred at this temperature for 1 h, after which a solution of diphenyl diselenide (0.453 g, 1.45 mmol) in diethyl ether (30 mL) was added dropwise. The resulting mixture was stirred at -78 °C for a further 1 h, then washed with 0.1 N sodium hydroxide (3 x 40 mL). The organic layer was dried with magnesium sulfate and concentrated under reduced pressure affording a yellow oil. The crude compound was purified by column chromatography on silica gel (hexane) and the resulting yellow solid was recrystallised by diffusion of hexane into a saturated solution of the compound in dichloromethane to give the product as colourless crystals (0.2 g, 30 %).

15 **5-Iodo-6-(phenyltelluro)acenaphthene [Acenap(I)(TePh)] (A6)**: *Synthesis of A6 from A14*: A solution of *n*-butyllithium (2.5 M) in hexane (0.50 mL, 1.26 mmol) was added dropwise to a solution of 5,6-diiodoacenaphthene (0.510 g, 1.26 mmol) in diethyl ether (40 mL) at -78 °C. The mixture was stirred at this temperature for 1 h, after which a solution of diphenyl ditelluride (0.514 g, 1.26 mmol) in diethyl ether (30 mL) was added dropwise. The resulting mixture was stirred at -78 °C for a further 1 h, then washed with 0.1 N sodium hydroxide (3 x 60 mL). The organic layer was dried with magnesium sulfate and concentrated under reduced pressure affording a yellow oil. The crude compound was purified by column chromatography on silica gel (hexane/dichloromethane 9:1) and the resulting yellow solid was recrystallised by diffusion of hexane into a saturated solution of the compound in dichloromethane to give the product as colourless crystals (0.1 g, 22 %); mp 77-79 °C; IR (KBr disk):  $\nu_{\text{max}}$  cm<sup>-1</sup> 2922w, 2834w, 1599w, 1547s, 1469w, 1431s, 1405s, 1341w, 1316s, 1263w, 1248s, 1228s, 1176w, 1154w, 1112w, 1095s, 1062w, 1036w, 1009s, 996s, 984w, 951w, 932w, 913w, 832vs, 801vs, 732vs, 25 691vs, 594s, 532w, 484w, 454s, 378w, 359w;  $\delta_{\text{H}}$ (270 MHz; CDCl<sub>3</sub>; 25 °C; Me<sub>4</sub>Si) 8.08 (1 H, d,  $^3J_{\text{HH}}$  7.3 Hz, Acenap 4-H), 7.96-7.89 (2 H, m, TePh 12,16-H), 7.49-7.31 (4 H, m, Acenap 7-H, TePh 13-15-H), 7.00 (1 H, d,  $^3J_{\text{HH}}$  7.3 Hz, Acenap 3-H), 6.92 (1 H, d,  $^3J_{\text{HH}}$  7.3 Hz, Acenap 8-H), 3.36-3.26 (4 H, m, 2 x CH<sub>2</sub>);  $\delta_{\text{C}}$ (67.9 MHz; CDCl<sub>3</sub>; 25 °C; Me<sub>4</sub>Si) 147.0(q), 141.9(s), 141.2(s), 138.4(q), 137.3(s), 130.4(s), 129.2(s), 128.0(q), 121.9(s), 121.8(s), 121.7(q), 113.9(q), 30.4(s, CH<sub>2</sub>), 30.0(s, CH<sub>2</sub>);  $\delta_{\text{Te}}$ (81.2 MHz; CDCl<sub>3</sub>; 25 °C; PhTeTePh) 662.0(s); MS (ES<sup>+</sup>): *m/z* 516.75 (100 %, M + OMe).

30

**5-Iodo-6-bromoacenaphthene [Acenap(I)(Br)] (A15)**: *Synthesis of A15 from A3*: A solution of *n*-butyllithium (2.5 M) in hexane (0.33 mL, 0.829 mmol) was added dropwise to a solution of 5-bromo-6-(phenyltelluro)acenaphthene (0.362 g, 0.829 mmol) in diethyl ether (30 mL) at -78 °C. The mixture was stirred at this temperature for 1 h, after which a solution of iodine (0.210 g, 0.829 mmol) in diethyl ether (30 mL) was added dropwise whilst the temperature of the mixture was maintained between -10-0°C. The resulting mixture was stirred at -10 °C for 1/2 h and for a further 1 h without cooling. Aqueous 5% sodium thiosulfate (60 mL) was added to the mixture with vigorous stirring. The organic layer was washed with aqueous sodium thiosulfate and then water, dried with magnesium sulfate and concentrated under reduced pressure affording a cream solid. The crude solid was washed with hexane and the white precipitate was collected by filtration. Recrystallisation by diffusion of hexane into a saturated solution of the compound in dichloromethane gave the product as

colourless crystals (0.05 g, 17 %); mp 144-146 °C; elemental analysis (Found: C, 40.7; H, 2.0. Calc. for C<sub>12</sub>H<sub>8</sub>I<sub>2</sub>Br: C, 40.15; H, 2.25 %); IR (KBr disk):  $\nu_{\max}$  cm<sup>-1</sup> 2938w, 2924w, 2819w, 1855w, 1595s, 1554w, 1434w, 1403s, 1344w, 1316s, 1249w, 1225s, 1142w, 1100s, 1067w, 1041w, 1014s, 939w, 887w, 834vs, 809s, 768w, 733w, 695w, 681w, 595s, 539w, 489w, 456w, 361w, 328w;  $\delta_{\text{H}}$ (270 MHz; CDCl<sub>3</sub>; 25 °C; Me<sub>4</sub>Si) 8.16 (1 H, d, <sup>3</sup>J<sub>HH</sub> 7.4 Hz, Acenap 7-H), 7.74 (1 H, d, <sup>3</sup>J<sub>HH</sub> 7.4 Hz, Acenap 4-H), 7.03 (1 H, d, <sup>3</sup>J<sub>HH</sub> 7.4 Hz, Acenap 3-H), 6.87 (1 H, d, <sup>3</sup>J<sub>HH</sub> 7.4 Hz, Acenap 8-H), 3.30-3.16 (4 H, m, 2 x CH<sub>2</sub>);  $\delta_{\text{C}}$ (67.9 MHz; CDCl<sub>3</sub>; 25 °C; Me<sub>4</sub>Si) 148.6(q), 148.1(q), 145.0(s), 141.6(q), 136.1(s), 129.7(q), 122.3(s), 121.3(s), 116.6(q), 85.6(q), 30.5(s, CH<sub>2</sub>), 30.3(s, CH<sub>2</sub>); MS (ES<sup>-</sup>): *m/z* 380.68 (100 %, M + Na - H).

**5,6-Bis(phenylsulfanyl)acenaphthene [Acenap(SPh)<sub>2</sub>] (A7):** *Synthesis of A7 from A1:* A solution of *n*-butyllithium (2.5 M) in hexane (0.66 mL, 1.65 mmol) was added dropwise to a solution of 5-bromo-6-(phenylsulfanyl)acenaphthene (0.562 g, 1.65 mmol) in diethyl ether (20 mL) at -78 °C. The mixture was stirred at this temperature for 1 h, after which a solution of diphenyl disulfide (0.360 g, 1.65 mmol) in diethyl ether (20 mL) was added dropwise. The resulting mixture was stirred at -78 °C for a further 1 h, then washed with 0.1 N sodium hydroxide (2 x 20 mL). The organic layer was dried with magnesium sulphate and concentrated under reduced pressure. The residual crude oil was purified by column chromatography on silica gel (hexane/dichloromethane 9:1) and the resulting white solid was recrystallised by diffusion of pentane into a saturated solution of the compound in dichloromethane to give the product as colourless crystals (0.4 g, 69%); mp 108-110 °C; elemental analysis (Found: C, 77.9; H, 4.9. Calc. for C<sub>24</sub>H<sub>18</sub>S<sub>2</sub>: C, 77.8; H, 4.9 %); IR (KBr disk):  $\nu_{\max}$  cm<sup>-1</sup> 2908w, 1655w, 1637w, 1597w, 1580s, 1475s, 1436s, 1415s, 1341w, 1322s, 1296w, 1256w, 1230w, 1199w, 1084s, 1067w, 1022s, 955w, 882w, 839s, 733vs, 686s, 622w, 569w, 505w, 463w;  $\delta_{\text{H}}$ (270 MHz; CDCl<sub>3</sub>; 25 °C; Me<sub>4</sub>Si) 7.40 (2 H, d, <sup>3</sup>J<sub>HH</sub> 7.3 Hz, Acenap 4,7-H), 7.16-7.10 (6 H, m, Acenap 3,8-H, SPh 12,16,18,22-H), 7.10-7.02 (6 H, m, SPh 13-15,19-21-H), 3.31 (4 H, s, 2 x CH<sub>2</sub>);  $\delta_{\text{C}}$ (67.9 MHz; CDCl<sub>3</sub>; 25 °C; Me<sub>4</sub>Si) 147.5(q), 141.4(q), 139.2(q), 136.4(s), 129.9(s), 129.1(s), 129.0(s), 127.8(q), 126.1(s), 120.4(s), 30.2(s, 2 x CH<sub>2</sub>); MS (ES<sup>+</sup>): *m/z* 393.02 (100, M + Na).

*Synthesis of A7 from A4:* A solution of *n*-butyllithium (2.5 M) in hexane (0.2 mL, 0.51 mmol) was added dropwise to a solution of 5-iodo-6-(phenylsulfanyl)acenaphthene (0.199 g, 0.51 mmol) in diethyl ether (20 mL) at -78 °C. The mixture was stirred at this temperature for 1 h, after which a solution of diphenyl disulfide (0.112 g, 0.51 mmol) in diethyl ether (20 mL) was added dropwise. The resulting mixture was stirred at -78 °C for a further 1 h, then washed with 0.1 N sodium hydroxide (2 x 20 mL). The organic layer was dried with magnesium sulphate and concentrated under reduced pressure. The residual crude oil was purified by column chromatography on silica gel (hexane/dichloromethane 9:1) and the resulting white solid was recrystallised by diffusion of pentane into a saturated solution of the compound in dichloromethane to give the product as colourless crystals (0.05 g, 28%).

*Synthesis of A7 from A13:* A solution of 5,6-dibromoacenaphthene (0.592 g, 1.897 mmol) in diethyl ether (40 mL) was cooled to -10 – 0 °C on an ice-ethanol bath and to this was added a solution of TMEDA (0.8 mL, 5.04 mmol). The mixture was allowed to stir for 15 min before a solution of *n*-butyllithium (2.5 M) in hexane (1.8 mL, 4.56 mmol) was added dropwise over a period of 15 min. During these operations, the temperature of the mixture was maintained at -10 – 0 °C. The mixture was stirred at this temperature for a further 1 h, before being cooled to -78 °C. A solution of diphenyl disulfide (0.829 g, 3.79 mmol) in diethyl ether (30 mL) was then added dropwise and the resulting solution was stirred at -78 °C for a further 1 h. The mixture was allowed to warm to room temperature and then washed with 0.1 N sodium hydroxide (3 x 60

mL). The organic layer was dried with magnesium sulfate and concentrated under reduced pressure to afford a yellow solid. The crude product was purified by column chromatography on silica gel (hexane/dichloromethane) and the resulting cream powder was recrystallised by diffusion of hexane into a saturated solution of the compound in dichloromethane to give colourless crystals (0.4 g, 54 %).

5

**5,6-Bis(phenylselanyl)acenaphthene [Acenap(SePh)<sub>2</sub>] (A8):** *Synthesis of A8 from A2:* A solution of *n*-butyllithium (2.5 M) in hexane (0.94 mL, 2.35 mmol) was added dropwise to a solution of 5-bromo-6-(phenylselanyl)acenaphthene (0.912 g, 2.35 mmol) in diethyl ether (20 mL) at -78 °C. The mixture was stirred at this temperature for 1 h, after which a solution of diphenyl diselenide (0.734 g, 2.35 mmol) in diethyl ether (20 mL) was added dropwise. The resulting mixture was stirred at 10 -78 °C for a further 1 h, then washed with 0.1 N sodium hydroxide (2 x 20 mL). The organic layer was dried with magnesium sulphate and concentrated under reduced pressure. The residual crude oil was purified by column chromatography on silica gel (hexane) and the resulting white solid was recrystallised by diffusion of hexane into a saturated solution of the compound in dichloromethane to give the product as colourless crystals (0.7 g, 60%); mp 104-106 °C; elemental analysis (Found: C, 62.12; H, 3.68. Calc. for C<sub>24</sub>H<sub>18</sub>Se<sub>2</sub>: C, 62.08; H, 3.91 %); IR (KBr disk):  $\nu_{\max}$  cm<sup>-1</sup> 15 2924w, 2872w, 2829w, 1957w, 1881w, 1857w, 1651w, 1637w, 1597s, 1573s, 1545w, 1474s, 1433s, 1410s, 1326s, 1301w, 1254w, 1232w, 1171w, 1157w, 1103s, 1069w, 1019s, 998w, 913w, 901w, 856w, 836vs, 811vs, 745vs, 732vs, 691s, 666w, 605s, 574w, 541w, 503w, 469s, 337w;  $\delta_{\text{H}}$ (270 MHz; CDCl<sub>3</sub>; 25 °C; Me<sub>4</sub>Si) 7.45 (2 H, d, <sup>3</sup>J<sub>HH</sub> 7.3 Hz, Acenap 4,7-H), 7.40-7.34 (4 H, m, SePh 12,16,18,22-H), 7.34-7.20 (6 H, m, SePh 13-15,19-21-H), 7.04 (2 H, d, <sup>3</sup>J<sub>HH</sub> 7.4 Hz, Acenap 3,8-H), 3.27 (4 H, s, 2 x CH<sub>2</sub>);  $\delta_{\text{C}}$ (67.9 MHz; CDCl<sub>3</sub>; 25 °C; Me<sub>4</sub>Si) 147.0(q), 141.3(q), 136.4(s), 134.6(q), 133.5(q), 133.3(s), 20 129.3(s), 127.2(s), 125.6(q), 120.6(s), 30.1(s, CH<sub>2</sub>);  $\delta_{\text{Se}}$ (51.5 MHz; CDCl<sub>3</sub>; 25 °C; PhSeSePh) 408.3(s); MS (ES<sup>+</sup>): *m/z* 465.96 (100 %, M + H).

*Synthesis of A8 from A5:* A solution of *n*-butyllithium (2.5 M) in hexane (0.17 mL, 0.427 mmol) was added dropwise to a solution of 5-iodo-6-(phenylselanyl)acenaphthene (0.186 g, 0.427 mmol) in diethyl ether (30 mL) at -78 °C. The mixture 25 was stirred at this temperature for 1 h, after which a solution of diphenyl diselenide (0.133 g, 0.427 mmol) in diethyl ether (20 mL) was added dropwise. The resulting mixture was stirred at -78 °C for a further 1 h, then washed with 0.1 N sodium hydroxide (2 x 20 mL). The organic layer was dried with magnesium sulphate and concentrated under reduced pressure. The residual crude oil was purified by column chromatography on silica gel (hexane/dichloromethane 9:1) and the resulting white solid was recrystallised by diffusion of pentane into a saturated solution of the compound in dichloromethane to give 30 the product as colourless crystals (0.06 g, 28%).

*Synthesis of A8 from A13:* A solution of 5,6-dibromoacenaphthene (0.676 g, 2.167 mmol) in diethyl ether (40 mL) was cooled to -10 – 0 °C on an ice-ethanol bath and to this was added a solution of TMEDA (0.9 mL, 5.76 mmol). The mixture was allowed to stir for 15 min before a solution of *n*-butyllithium (2.5 M) in hexane (2.1 mL, 5.21 mmol) was added 35 dropwise over a period of 15 min. During these operations, the temperature of the mixture was maintained at -10 – 0 °C. The mixture was stirred at this temperature for a further 1 h, before being cooled to -78 °C. A solution of diphenyl diselenide (1.353 g, 4.33 mmol) in diethyl ether (30 mL) was then added dropwise and the resulting solution was stirred at -78 °C for a further 1 h. The mixture was allowed to warm to room temperature and then washed with 0.1 N sodium hydroxide (3 x 60 mL). The organic layer was dried with magnesium sulfate and concentrated under reduced pressure to

afford a red solid. The crude product was purified by column chromatography on silica gel (hexane/dichloromethane) and the resulting cream powder was recrystallised by diffusion of hexane into a saturated solution of the compound in dichloromethane to give colourless crystals (0.5 g, 52 %).

5 **5,6-Bis(phenyltelluro)acenaphthene [Acenap(TePh)<sub>2</sub>] (A9):** *Synthesis of A9 from A13:* A solution of 5,6-dibromoacenaphthene (0.548 g, 1.756 mmol) in diethyl ether (40 mL) was cooled to -10 – 0 °C on an ice-ethanol bath and to this was added a solution of TMEDA (0.7 mL, 4.67 mmol). The mixture was allowed to stir for 15 min before a solution of *n*-butyllithium (2.5 M) in hexane (1.7 mL, 4.22 mmol) was added dropwise over a period of 15 min. During these operations, the temperature of the mixture was maintained at -10 – 0 °C. The mixture was stirred at this temperature for a  
10 further 1 h, before being cooled to -78 °C. A solution of diphenyl ditelluride (1.438 g, 3.51 mmol) in diethyl ether (30 mL) was then added dropwise and the resulting solution was stirred at -78 °C for a further 1 h. The mixture was allowed to warm to room temperature and then washed with 0.1 N sodium hydroxide (3 x 60 mL). The organic layer was dried with magnesium sulfate and concentrated under reduced pressure to afford a red solid. The crude product was purified by  
15 column chromatography on silica gel (hexane/dichloromethane) and the resulting cream powder was recrystallised by  
diffusion of hexane into a saturated solution of the compound in dichloromethane to give colourless crystals (0.5 g, 55 %);  
mp 146-148 °C; elemental analysis (Found: C, 51.5; H, 2.95. Calc. for C<sub>24</sub>H<sub>18</sub>Te<sub>2</sub>: C, 51.3; H, 3.2 %); IR (KBr disk):  $\nu_{\max}$   
cm<sup>-1</sup> 2914w, 2867w, 2824w, 1599w, 1588w, 1567s, 1483w, 1469s, 1429s, 1403s, 1320s, 1261w, 1247w, 1230s, 1176w,  
1150w, 1112w, 1097s, 1057s, 1013s, 996s, 896w, 834s, 806s, 729vs, 690vs, 650w, 598s, 534w, 484w, 449s, 311w;  $\delta_{\text{H}}$ (270  
MHz; CDCl<sub>3</sub>; 25 °C; Me<sub>4</sub>Si) 7.81 (2 H, d, <sup>3</sup>J<sub>HH</sub> 7.3 Hz, Acenap 4,7-H), 7.64-7.54 (4 H, m, TePh 12,16,18,22-H), 7.24-7.07  
20 (6 H, m, TePh 13-15,19-21-H), 6.97 (2 H, d, <sup>3</sup>J<sub>HH</sub> 7.3 Hz, Acenap 3,8-H), 3.27 (4 H, s, 2 x CH<sub>2</sub>);  $\delta_{\text{C}}$ (67.9 MHz; CDCl<sub>3</sub>;  
25 °C; Me<sub>4</sub>Si) 148.5(q), 142.5(s), 141.2(q), 139.0(q), 138.1(s), 129.9(s), 128.2(s), 122.9(q), 121.5(s), 113.5(q), 30.3(s, 2 x  
CH<sub>2</sub>);  $\delta_{\text{Te}}$ (81.2 MHz; CDCl<sub>3</sub>; 25 °C; PhTeTePh) 585.9(s); MS (ES<sup>+</sup>): *m/z* 592.94 (100, M + OMe).

5 **5-(Phenylsulfanyl)-6-(phenylselanyl)acenaphthene [Acenap(SePh)(SPh)] (A10):** *Synthesis of A10 from A1:* A solution  
25 of *n*-butyllithium (2.5 M) in hexane (0.54 mL, 1.35 mmol) was added dropwise to a solution of 5-bromo-6-  
(phenylsulfanyl)acenaphthene (0.460 g, 1.35 mmol) in diethyl ether (20 mL) at -78 °C. The mixture was stirred at this  
temperature for 1 h, after which a solution of diphenyl diselenide (0.421 g, 1.35 mmol) in diethyl ether (20 mL) was added  
dropwise. The resulting mixture was stirred at -78 °C for a further 1 h, then washed with 0.1 N sodium hydroxide (2 x 20  
mL). The organic layer was dried with magnesium sulphate and concentrated under reduced pressure. The residual crude  
30 oil was purified by column chromatography on silica gel (hexane) and the resulting white solid was recrystallised by  
diffusion of hexane into a saturated solution of the compound in dichloromethane to give the product as colourless crystals  
(0.2 g, 37%); mp 106-108 °C; elemental analysis (Found: C, 69.15; H, 4.6. Calc. for C<sub>24</sub>H<sub>18</sub>SSe: C, 69.1; H, 4.35 %); IR  
(KBr disk):  $\nu_{\max}$  cm<sup>-1</sup> 2914w, 2829w, 1959w, 1936w, 1860w, 1654w, 1595s, 1578s, 1475s, 1436s, 1408s, 1331vs, 1301w,  
1254w, 1230w, 1216w, 1176w, 1152w, 1107w, 1082s, 1062w, 1021s, 998w, 936w, 915w, 894w, 865w, 836vs, 816s,  
35 778w, 747vs, 732vs, 690vs, 624w, 608w, 579w, 555w, 510w, 466s, 404w, 311w;  $\delta_{\text{H}}$ (270 MHz; CDCl<sub>3</sub>; 25 °C; Me<sub>4</sub>Si) 7.79  
(1 H, d, <sup>3</sup>J<sub>HH</sub> 7.2 Hz, Acenap 4-H), 7.64-7.59 (2 H, m, SePh 12,16-H), 7.41-7.33 (3 H, m, SePh 13-15-H), 7.31 (1 H, d,  
<sup>3</sup>J<sub>HH</sub> 7.2 Hz, Acenap 3-H), 7.26-7.19 (2 H, m, SPh 18,22-H), 7.16-7.09 (4 H, m, Acenap 7-H, SPh 19-21-H), 7.06 (1 H, d,  
<sup>3</sup>J<sub>HH</sub> 7.0 Hz, Acenap 8-H), 3.46-3.40 (2 H, m, CH<sub>2</sub>), 3.40-3.33 (2 H, m, CH<sub>2</sub>);  $\delta_{\text{C}}$ (67.9 MHz; CDCl<sub>3</sub>; 25 °C; Me<sub>4</sub>Si)  
149.3(q), 145.0(q), 141.4(q), 140.6(q), 139.7(s), 136.3(s), 132.9(q), 132.4(q), 131.7(s), 129.5(s), 128.9(s), 128.2(s),

128.0(q), 127.4(s), 125.3(s), 125.1(q), 120.7(s), 120.3(s), 30.4(s, CH<sub>2</sub>), 29.8(s, CH<sub>2</sub>);  $\delta_{\text{Se}}$ (51.5 MHz; CDCl<sub>3</sub>; 25 °C; PhSeSePh) 433.7(s); MS (ES<sup>+</sup>): *m/z* 441.05 (100 %, M + Na), 418.05 (25, M + H).

*Synthesis of A10 from A2*: A solution of *n*-butyllithium (2.5 M) in hexane (0.30 mL, 0.783 mmol) was added dropwise to a solution of 5-bromo-6-(phenylselanyl)acenaphthene (0.304 g, 0.783 mmol) in diethyl ether (40 mL) at -78 °C. The mixture was stirred at this temperature for 1 h, after which a solution of diphenyl disulfide (0.171 g, 0.783 mmol) in diethyl ether (30 mL) was added dropwise. The resulting mixture was stirred at -78 °C for a further 1 h, then washed with 0.1 N sodium hydroxide (2 x 60 mL). The organic layer was dried with magnesium sulfate and concentrated under reduced pressure. The residual crude oil was purified by column chromatography on silica gel (hexane) and the resulting white solid was recrystallised by diffusion of hexane into a saturated solution of the compound in dichloromethane to give colourless crystals (0.03 g, 36 %).

*Synthesis of A10 from A4*: A solution of *n*-butyllithium (2.5 M) in hexane (0.23 mL, 0.583 mmol) was added dropwise to a solution of 5-iodo-6-(phenylsulfanyl)acenaphthene (0.226 g, 0.583 mmol) in diethyl ether (20 mL) at -78 °C. The mixture was stirred at this temperature for 1 h, after which a solution of diphenyl diselenide (0.182 g, 0.583 mmol) in diethyl ether (20 mL) was added dropwise. The resulting mixture was stirred at -78 °C for a further 1 h, then washed with 0.1 N sodium hydroxide (2 x 40 mL). The organic layer was dried with magnesium sulfate and concentrated under reduced pressure. The residual crude oil was purified by column chromatography on silica gel (hexane) and the resulting white solid was recrystallised by diffusion of hexane into a saturated solution of the compound in dichloromethane to give colourless crystals (0.05 g, 21 %).

*Synthesis of A10 from A5*: A solution of *n*-butyllithium (2.5 M) in hexane (0.37 mL, 0.783 mmol) was added dropwise to a solution of 5-iodo-6-(phenylselanyl)acenaphthene (0.397 g, 0.912 mmol) in diethyl ether (30 mL) at -78 °C. The mixture was stirred at this temperature for 1 h, after which a solution of diphenyl disulfide (0.199 g, 0.912 mmol) in diethyl ether (30 mL) was added dropwise. The resulting mixture was stirred at -78 °C for a further 1 h, then washed with 0.1 N sodium hydroxide (2 x 40 mL). The organic layer was dried with magnesium sulfate and concentrated under reduced pressure. The residual crude oil was purified by column chromatography on silica gel (hexane) and the resulting white solid was recrystallised by diffusion of hexane into a saturated solution of the compound in dichloromethane to give colourless crystals (0.2 g, 52 %).

**5-(Phenyltelluro)-6-(phenylsulfanyl)acenaphthene [Acenap(TePh)(SPh)] (A11)**: *Synthesis of A11 from A1*: A solution of *n*-butyllithium (2.5 M) in hexane (0.59 mL, 1.47 mmol) was added dropwise to a solution of 5-bromo-6-(phenylsulfanyl)acenaphthene (0.501 g, 1.47 mmol) in diethyl ether (40 mL) at -78 °C. The mixture was stirred at this temperature for 1 h, after which a solution of diphenyl ditelluride (0.602 g, 1.47 mmol) in diethyl ether (30 mL) was added dropwise. The resulting mixture was stirred at -78 °C for a further 1 h, then washed with 0.1 N sodium hydroxide (2 x 60 mL). The organic layer was dried with magnesium sulfate and concentrated under reduced pressure. The residual crude oil was purified by column chromatography on silica gel (hexane) and the resulting cream powder was recrystallised by diffusion of hexane into a saturated solution of the compound in dichloromethane to give colourless crystals (0.2 g, 30 %); mp 110-112 °C; elemental analysis (Found: C, 62.12; H, 3.68. Calc. for C<sub>24</sub>H<sub>18</sub>STe: C, 61.85; H, 3.89 %); IR (KBr disk):



$\nu_{\max}$   $\text{cm}^{-1}$  2923w, 2824w, 1957w, 1931w, 1855w, 1637w, 1595s, 1578s, 1475s, 1434s, 1427s, 1407s, 1331s, 1299w, 1254w, 1232w, 1202w, 1178w, 1154w, 1105w, 1078w, 1058w, 1020s, 996w, 913w, 863w, 836s, 809s, 736vs, 693s, 624w, 602w, 487w, 455w, 397w;  $\delta_{\text{H}}$ (270 MHz;  $\text{CDCl}_3$ ; 25 °C;  $\text{Me}_4\text{Si}$ ) 7.88-7.81 (2 H, m, *TePh* 12,16-H), 7.72 (1 H, d,  $^3J_{\text{HH}}$  7.2 Hz, *Acenap* 4-H), 7.37-7.30 (1 H, m, *TePh* 14-H), 7.28-7.19 (3 H, m, *Acenap* 3-H, *TePh* 13,15-H), 7.18-7.07 (3 H, m, *Acenap* 5-H, *SPh* 18,22-H), 7.05-6.95 (3 H, m, *SPh* 19-21-H), 6.90 (1 H, d,  $^3J_{\text{HH}}$  7.4 Hz, *Acenap* 8-H), 3.39-3.22 (4 H, m, 2 x  $\text{CH}_2$ );  $\delta_{\text{C}}$ (67.9 MHz;  $\text{CDCl}_3$ ; 25 °C;  $\text{Me}_4\text{Si}$ ) 150.2(q), 145.4(q), 141.4(q), 141.3(s), 140.4(q), 139.9(s), 135.6(q), 134.9(s), 129.7(s), 129.1(q), 129.0(s), 128.6(s), 126.9(s), 125.7(s), 124.8(q), 121.5(s), 120.2(s), 111.7(q), 30.5(s,  $\text{CH}_2$ ), 29.8(s,  $\text{CH}_2$ );  $\delta_{\text{Te}}$ (81.2 MHz;  $\text{CDCl}_3$ ; 25 °C; *PhTeTePh*) 689.4(s); MS ( $\text{ES}^+$ ):  $m/z$  499.03 (100 %, M + OMe).

10 **Synthesis of A11 from A4:** A solution of *n*-butyllithium (2.5 M) in hexane (0.29 mL, 0.737 mmol) was added dropwise to a solution of 5-iodo-6-(phenylsulfanyl)acenaphthene (0.286 g, 0.737 mmol) in diethyl ether (30 mL) at -78 °C. The mixture was stirred at this temperature for 1 h, after which a solution of diphenyl ditelluride (0.302 g, 0.737 mmol) in diethyl ether (30 mL) was added dropwise. The resulting mixture was stirred at -78 °C for a further 1 h, then washed with 0.1 N sodium hydroxide (2 x 40 mL). The organic layer was dried with magnesium sulfate and concentrated under reduced pressure. The  
15 residual crude oil was purified by column chromatography on silica gel (hexane) and the resulting yellow solid was recrystallised by diffusion of hexane into a saturated solution of the compound in dichloromethane to give colourless crystals (0.1 g, 35 %).

**5-(Phenyltelluro)-6-(phenylselanyl)acenaphthene [Acenap(TePh)(SePh)] (A12):** **Synthesis of A12 from A2:** A solution  
20 of *n*-butyllithium (2.5 M) in hexane (0.75 mL, 1.88 mmol) was added dropwise to a solution of 5-bromo-6-(phenylselanyl)acenaphthene (0.731 g, 1.88 mmol) in diethyl ether (40 mL) at -78 °C. The mixture was stirred at this temperature for 1 h, after which a solution of diphenyl ditelluride (0.771 g, 1.88 mmol) in diethyl ether (30 mL) was added dropwise. The resulting mixture was stirred at -78 °C for a further 1 h, then washed with 0.1 N sodium hydroxide (2 x 60 mL). The organic layer was dried with magnesium sulfate and concentrated under reduced pressure. The residual crude oil  
25 was purified by column chromatography on silica gel (hexane) and the resulting yellow solid was recrystallised by diffusion of hexane into a saturated solution of the compound in dichloromethane to give colourless crystals (0.6 g, 62%); mp 138-140 °C; elemental analysis (Found: C, 56.4; H, 3.5. Calc. for  $\text{C}_{24}\text{H}_{18}\text{SeTe}$ : C, 56.2; H, 3.5 %); IR (KBr disk):  $\nu_{\max}$   $\text{cm}^{-1}$  2947w, 2909w, 2834w, 1950w, 1876w, 1855w, 1595s, 1573s, 1474s, 1432s, 1405s, 1324s, 1299w, 1249w, 1230s, 1154w, 1112w, 1097s, 1065s, 1018s, 998w, 896w, 837vs, 807w, 764w, 729vs, 687vs, 664s, 614w, 600s, 539w, 489w,  
30 451s, 399w, 333w;  $\delta_{\text{H}}$ (270 MHz;  $\text{CDCl}_3$ ; 25 °C;  $\text{Me}_4\text{Si}$ ) 7.98 (1 H, d,  $^3J_{\text{HH}}$  7.2 Hz, *Acenap* 4-H), 7.96-7.91 (2 H, m, *TePh* 12,16-H), 7.46-7.41 (1 H, m, *TePh* 14-H), 7.38-7.31 (3 H, m, *Acenap* 7-H, *TePh* 13,15-H), 7.31-7.24 (3 H, m, *Acenap* 3-H, *SePh* 18,22-H), 7.24-7.14 (3 H, m, *SePh* 19-21-H), 7.00 (1 H, d,  $^3J_{\text{HH}}$  7.4 Hz, *Acenap* 8-H), 3.44-3.34 (4 H, m, 2 x  $\text{CH}_2$ );  $\delta_{\text{C}}$ (67.9 MHz;  $\text{CDCl}_3$ ; 25 °C;  $\text{Me}_4\text{Si}$ ) 149.8(q), 145.8(q), 141.3(q), 141.1(s), 140.8(s), 136.0(q), 135.8(s), 135.7(q), 129.8(s), 129.7(s), 129.2(s), 128.4(s), 126.4(s), 123.2(q), 122.3(q), 121.3(s), 120.4(s), 113.0(q), 30.4(s,  $\text{CH}_2$ ), 29.7(s,  $\text{CH}_2$ );  
35  $\delta_{\text{Se}}$ (51.5 MHz;  $\text{CDCl}_3$ ; 25 °C; *PhSeSePh*) 340.7 (s,  $^4J_{\text{SeTe}} \pm 715.6$  Hz);  $\delta_{\text{Te}}$ (81.2 MHz;  $\text{CDCl}_3$ ; 25 °C; *PhTeTePh*) 663.4 (s,  $^4J_{\text{TeSe}} \pm 715.6$  Hz); MS ( $\text{ES}^+$ ):  $m/z$  544.87 (100 %, M + OMe).

**Synthesis of A12 from A5:** A solution of *n*-butyllithium (2.5 M) in hexane (0.26 mL, 0.657 mmol) was added dropwise to a solution of 5-iodo-6-(phenylselanyl)acenaphthene (0.286 g, 0.657 mmol) in diethyl ether (40 mL) at -78 °C. The mixture

was stirred at this temperature for 1 h, after which a solution of diphenyl ditelluride (0.269 g, 0.657 mmol) in diethyl ether (30 mL) was added dropwise. The resulting mixture was stirred at -78 °C for a further 1 h, then washed with 0.1 N sodium hydroxide (2 x 30 mL). The organic layer was dried with magnesium sulfate and concentrated under reduced pressure. The residual crude oil was purified by column chromatography on silica gel (hexane) and the resulting yellow solid was recrystallised by diffusion of hexane into a saturated solution of the compound in dichloromethane to give colourless crystals (0.1 g, 32%).

**5,6-diiodoacenaphthene(Acenap(I)<sub>2</sub>) (A14):** *Synthesis of A14 from A13:* A solution of TMEDA (6.42 mL, 42.7 mmol) was added to a solution of 5,6-dibromoacenaphthene (5.005 g, 16.04mmol) in diethyl ether (300 mL). To this *n*-butyllithium (2.5 M) in hexane (15.4 mL, 38.50 mmol) was added dropwise at -78 °C and stirred at this temperature for a further 1 h. The temperature of the reaction mixture was allowed to warm to -10 °C after which a solution of iodine (9.038 g, 35.61 mmol) in diethyl ether (80 mL) was added dropwise. The resulting mixture was stirred at -10 °C for a further 1/2 h and for a further 1 h without cooling. Aqueous 5% sodium thiosulfate (300 mL) was added to the mixture with vigorous stirring. The organic layer was washed with aqueous sodium thiosulfate and then water, dried with magnesium sulfate and concentrated under reduced pressure affording a pale brown solid. The title compound was purified by column chromatography on silica gel (hexane) and the resulting brown crystalline solid recrystallised by diffusion of hexane into a saturated solution of the compound in dichloromethane to give colourless crystals (1.9 g, 28 %); mp 158-159 °C (lit.,<sup>ref.</sup>, 159-160 °C); IR (KBr disk):  $\nu_{\max}$  cm<sup>-1</sup> 2938s, 2924s, 2862s, 2815s, 2625w, 2563w, 2436w, 2308w, 2232w, 2127w, 2023w, 1933w, 1857s, 1808w, 1770w, 1739w, 1649w, 1595s, 1550s, 1486w, 1431s, 1405s, 1355w, 1339w, 1311s, 1261s, 1249s, 1223s, 1142w, 1097s, 1007s, 955w, 941w, 882w, 832vs, 806vs, 738s, 678s, 648w, 593s, 534w, 482s, 458w, 394w, 380w;  $\delta_{\text{H}}$ (270 MHz; CDCl<sub>3</sub>; 25 °C; Me<sub>4</sub>Si) 8.23 (2 H, d, <sup>3</sup>J<sub>HH</sub> 7.5 Hz, Acenap 4,7-H), 6.91 (2 H, d, <sup>3</sup>J<sub>HH</sub> 7.5 Hz, Acenap 3,8-H), 3.26 (4 H, s, 2 x CH<sub>2</sub>);  $\delta_{\text{C}}$ (67.9 MHz; CDCl<sub>3</sub>; 25 °C; Me<sub>4</sub>Si) 149.0(q), 144.7(s), 131.3(q), 121.9(s), 121.0(q), 89.5(q), 30.0(s, 2 x CH<sub>3</sub>).

## 2. Computational Details

Geometries were fully optimised in the gas phase at the B3LYP level<sup>[4]</sup> using Curtis and Binning's 962(d) basis<sup>[5]</sup> on Se and Br (augmented with a set of diffuse s and p functions on Br), the Stuttgart-Dresden effective core potentials along with their double zeta valence basis sets for Te and I<sup>[6]</sup> (augmented with d-polarisation functions with exponents of 0.237 and 0.241, respectively),<sup>[7]</sup> and 6-31+G(d) basis elsewhere. Wiberg bond indices<sup>8</sup> were obtained in a natural bond orbital analysis<sup>9</sup> at the same level. The optimisations were started from a number of different conformers for those compounds containing a phenylchalcogen substituent. For the mono-phenyl chalcogens these were A and B. For the di-phenylchalcogens these were AAc, AAt, AB, and BB. Mixed chalcogen structures also included the BA conformer. For the dichalcogen compounds, experimental structures from X-ray crystallography were used as one of the starting conformers. The computations were performed using the Gaussian 03 suite of programs.<sup>[10]</sup>

The  $J(^{77}\text{Se}, ^{125}\text{Te})$  spin-spin coupling constants of **A12** and **N12** were computed<sup>[11]</sup> at the BP86 level<sup>[12]</sup> using the relativistic zeroth-order regular approximation both in its scalar formulation (ZORA)<sup>[13]</sup> and with spin-orbit coupling (ZORA-SO),<sup>[14]</sup> together with a TZ2P basis of Slater-type orbitals. A fine integration grid was used (Integration 6), as well as a finite nuclear size. These calculations were performed with the ADF program.<sup>[15,16]</sup> Employing the B3LYP-optimised geometries

(BA conformations),  $J$  values of  $-490$  Hz and  $-658$  Hz were obtained for **A12** and **N12**, respectively, at the ZORA level ( $-480$  Hz and  $-647$  Hz, respectively, at ZORA-SO). While the observed values of  $|J| = 715.6$  Hz (**A12**) and  $834.0$  Hz (**N12**) are underestimated in absolute terms, the signs (which stem from the negative sign of the  $^{125}\text{Te}$  gyromagnetic ratio) should be reliable and were used to assign a negative sign to the observed  $J(^{77}\text{Se}, ^{125}\text{Te})$  values.

5

**Table S1:** Selected optimised parameters WBIs, and relative energies (kJ/mol) of mono-phenylchalcogen acenaphthene derivatives **A1-A6** (B3LYP level), including structural data from X-ray crystallography, where available)

| Compound                                   | A1 XRD-A   | A1-A    | A1-B    | A2 XRD-B   | A2-A    | A2-B    |
|--------------------------------------------|------------|---------|---------|------------|---------|---------|
| X, EPh                                     | Br, S      | Br, S   | Br, S   | Br, Se     | Br, Se  | Br, Se  |
| Energy(rel)* / kJ/mol                      | -          | 0.00    | 0.32    | -          | 6.05    | 0.00    |
| X(1)···E(1) / Å                            | 3.297(3)   | 3.3538  | 3.1888  | 3.1588(16) | 3.4301  | 3.2231  |
| WBI X(1)···E(1)                            | -          | 0.0060  | 0.0254  | -          | 0.0079  | 0.0413  |
| X(1)-C(1) / Å                              | 1.926(7)   | 1.9255  | 1.9293  | 1.905(5)   | 1.9250  | 1.9295  |
| E(1)-C(9) / Å                              | 1.777(7)   | 1.7963  | 1.8093  | 1.943(5)   | 1.9456  | 1.9631  |
| C(10)-C(9)-E(1)-C(13); $\theta_1 / ^\circ$ | -89.44(1)  | -81.399 | 170.□85 | 159.92(1)  | -80.291 | 179.726 |
| C(9)-E(1)-C(13)-C(14); $\gamma_1 / ^\circ$ | 170.06(1)  | 168.816 | 102.258 | 95.94(1)   | -2□.195 | 92.910  |
| Compound                                   | A3 XRD-B   | A3-A    | A3-B    | A4 XRD-A   | A4-A    | A4-C    |
| X, EPh                                     | Br, Te     | Br, Te  | Br, Te  | I, S       | I, S    | I, S    |
| Energy(rel)* / kJ/mol                      | -          | 15.11   | 0.00    | -          | 0.00    | 1.□4    |
| X(1)···E(1) / Å                            | 3.2503(14) | 3.5625  | 3.3189  | 3.428(4)   | 3.4799  | 3.3620  |
| WBI X(1)···E(1)                            | -          | 0.0111  | 0.0620  | -          | 0.0115  | 0.0290  |
| X(1)-C(1) / Å                              | 1.919(10)  | 1.9255  | 1.9309  | 2.129(13)  | 2.1514  | 2.1512  |
| E(1)-C(9) / Å                              | 2.148(10)  | 2.1499  | 2.1661  | 1.773(14)  | 1.7947  | 1.8074  |
| C(10)-C(9)-E(1)-C(13); $\theta_1 / ^\circ$ | 162.39(1)  | -77.267 | 175.394 | 90.15(1)   | -85.000 | 150.547 |
| C(9)-E(1)-C(13)-C(14); $\gamma_1 / ^\circ$ | 100.03(1)  | 153.061 | 96.172  | 151.86(1)  | 174.347 | 116.508 |
| Compound                                   | A5 XRD-B   | A5-A    | A5-B    | A6 XRD-B   | A6-A    | A6-B    |
| X, EPh                                     | I, Se      | I, Se   | I, Se   | I, Te      | I, Te   | I, Te   |
| Energy(rel)* / kJ/mol                      | -          | 4.82    | 0.00    | -          | 15.13   | 0.00    |
| X(1)···E(1) / Å                            | 3.3291(11) | 3.5653  | 3.3842  | 3.3721(17) | 3.7054  | 3.4553  |
| WBI X(1)···E(1)                            | -          | 0.0141  | 0.0504  | -          | 0.0181  | 0.0841  |
| X(1)-C(1) / Å                              | 2.110(7)   | 2.1517  | 2.1497  | 2.058(16)  | 2.1517  | 2.1497  |
| E(1)-C(9) / Å                              | 1.930(7)   | 1.9435  | 1.9622  | 2.176(17)  | 2.1474  | 2.1693  |
| C(10)-C(9)-E(1)-C(13); $\theta_1 / ^\circ$ | -165.87(1) | -80.612 | 161.047 | -161.42(1) | -84.399 | 179.978 |
| C(9)-E(1)-C(13)-C(14); $\gamma_1 / ^\circ$ | -92.60(1)  | 163.542 | -80.713 | -101.61(1) | 160.161 | 92.576  |

<sup>a</sup> Distances in Å, angles in degrees, relative energies in kJ/mol.



**Table S2** Selected optimised parameters WBIs, and relative energies (kJ/mol) of di-phenylchalcogen acenaphthene derivatives **A7-A12** (B3LYP level), including structural data from X-ray crystallography, where available)

| <b>Compound</b>                | <b>A7 XRD-AA†</b> | <b>A7-AA†</b>  | <b>A7-AB</b>  | <b>A7-CC†</b> |
|--------------------------------|-------------------|----------------|---------------|---------------|
| Eph, E'Ph                      | S, S              | S, S           | S, S          | S, S          |
| Energy(rel)* / kJ/mol          | -                 | 3.21           | 0.00          | 3.21          |
| E(1)⋯E(2) / Å                  | 3.274(4)          | 3.3227         | 3.1351        | 3.0862        |
| WBI E(1)⋯E(2)                  | -                 | 0.0065         | 0.0314        | 0.0364        |
| E(1)-C(1) / Å                  | 1.812(12)         | 1.7912         | 1.8068        | 1.8060        |
| E(2)-C(9) / Å                  | 1.782(11)         | 1.7912         | 1.7952        | 1.8070        |
| C(10)-C(1)-E(1)-C(13) □ θ1 / ° | 75.64(1)          | 82.320         | 164.523       | 139.201       |
| C(10)-C(9)-E(2)-C(19); θ2 / °  | 92.07(1)          | 82.337         | -86.587       | 144.087       |
| C(1)-E(1)-C(13)-C(14); γ1 / °  | -4.51(1)          | 8.688          | -79.244       | -57.640       |
| C(9)-E(2)-C(19)-C(20); γ2 / °  | 30.56(1)          | 8.635          | -9.636        | -62.374       |
| <b>Compound</b>                | <b>A8 XRD-AB</b>  | <b>A8-AA†</b>  | <b>A8-AB</b>  |               |
| Eph, E'Ph                      | Se, Se            | Se, Se         | Se, Se        |               |
| Energy(rel)* / kJ/mol          | -                 | 11.00          | 0.00          |               |
| E(1)⋯E(2) / Å                  | 3.1834(10)        | 3.4720         | 3.2170        |               |
| WBI E(1)⋯E(2)                  | -                 | 0.0123         | 0.0660        |               |
| E(1)-C(1) / Å                  | 1.928(9)          | 1.9358         | 1.9382        |               |
| E(2)-C(9) / Å                  | 1.932(8)          | 1.9358         | 1.9614        |               |
| C(10)-C(1)-E(1)-C(13); θ1 / °  | -□7.70(1)         | 81.607         | 92.012        |               |
| C(10)-C(9)-E(2)-C(19); θ2 / °  | 163.05(1)         | 81.610         | -174.155      |               |
| C(1)-E(1)-C(13)-C(14); γ1 / °  | -148.68(1)        | -168.996       | -177.769      |               |
| C(9)-E(2)-C(19)-C(20); γ2 / °  | -84.31(1)         | -168.992       | -97.683       |               |
| <b>Compound</b>                | <b>A9 XRD-AB</b>  | <b>A9-AA†</b>  | <b>A9-AB</b>  |               |
| Eph, E'Ph                      | Te, Te            | Te □ Te        | Te, Te        |               |
| Energy(rel)* / kJ/mol          | -                 | 22.77          | 0.00          |               |
| E(1)⋯E(2) / Å                  | 3.3674(19)        | 3.7237         | 3.4228        |               |
| WBI E(1)⋯E(2)                  | -                 | 0.0234         | 0.1404        |               |
| E(1)-C(1) / Å                  | 2.180(17)         | 2.1320         | 2.1674        |               |
| E(2)-C(9) / Å                  | 2.155(17)         | 2.1346         | 2.1426        |               |
| C(10)-C(1)-E(1)-C(13); θ1 / °  | 166.60(1)         | 74.708         | 161.011       |               |
| C(10)-C(9)-E(2)-C(19); θ2 / °  | 79.56(1)          | 75.924         | 95.269        |               |
| C(1)-E(1)-C(13)-C(14); γ1 / °  | 86.37(1)          | 22.353         | 103.489       |               |
| C(9)-E(2)-C(19)-C(20); γ2 / °  | -167.34(1)        | -149.017       | 113.643       |               |
| <b>Compound</b>                | <b>A10 XRD-BA</b> | <b>A10-AA†</b> | <b>A10-AB</b> | <b>A10-BA</b> |
| Eph, E'Ph                      | Se, S             | Se, S          | Se, S         | Se, S         |
| Energy(□el)* / kJ/mol          | -                 | 11.53          | 8.74          | 0.00          |
| E(1)⋯E(2) / Å                  | 3.113(4)          | 3.3946         | 3.2127        | 3.1313        |
| WBI E(1)⋯E(2)                  | -                 | 0.0107         | 0.0386        | 0.0565        |
| E(1)-C(1) / Å                  | 1.953(10)         | 1.9452         | 1.9418        | 1.9600        |
| E(2)-C(9) / Å                  | 1.798(11)         | 1.7962         | 1.8076        | 1.7932        |
| C(10)-C(1)-E(1)-C(13); θ1 / °  | 156.26(1)         | 79. □07        | 85.260        | -176.246      |
| C(10)-C(9)-E(2)-C(19); θ2 / °  | -100.46(1)        | 84.009         | -168.158      | 93.960        |
| C(1)-E(1)-C(13)-C(14); γ1 / °  | -82.12(1)         | -167.224       | -166.930      | -96.424       |
| C(9)-E(2)-C(19)-C(20); γ2 / °  | 5.36(1)           | 5.482          | 83.269        | -1.233        |

| Compound                      | A11 XRD-BA | A11-AA <sub>t</sub> | A11-BA   | A11-AC□    |
|-------------------------------|------------|---------------------|----------|------------|
| Eph, E'Ph                     | Te, S      | Te, S               | Te, S    | Te, S      |
| Energy(rel)* / kJ/mol         | -          | 22.70               | 0.00     | 22.2534978 |
| E(1)···E(2) / Å               | 3.1576(15) | 3.5077              | 3.1908   | 3.3768     |
| WBI E(1)···E(2)               | -          | 0.0149              | 0.0905   | 0.0387     |
| E(1)-C(1) / Å                 | 2.138(6)   | 2.1477              | 2.1608   | 2.1438     |
| E(2)-C(9) / Å                 | 1.781(7)   | 1.7960              | 1.7945   | 1.8071     |
| C(10)-C(1)-E(1)-C(13); θ1 / ° | 166.03(1)  | 73.351              | -179.857 | 83.607     |
| C(10)-C(9)-E(2)-C(19); θ2 / ° | -95.67(1)  | 88.092              | 100.995  | -154.366   |
| C(1)-E(1)-C(13)-C(14); γ1 / ° | -83.57(1)  | 30.354              | 91.648   | 30.520     |
| C(9)-E(2)-C(19)-C(20); γ2 / ° | -150.20(1) | 176.838             | 159.248  | -114.342   |

| Compound                      | A12 XRD-BA | A12-AA <sub>t</sub> | A12AB    | A12-BA   |
|-------------------------------|------------|---------------------|----------|----------|
| Eph, E'Ph                     | Te, Se     | Te, Se              | Te, Se   | Te, Se   |
| Energy(rel)* / kJ/mol         | -          | 23.88               | 16.22    | 0.00     |
| E(1)···E(2) / Å               | 3.2479(19) | 3.5863              | 3.3733   | 3.2668   |
| WBI E(1)···E(2)               | -          | 0.0176              | 0.0704   | 0.1156   |
| E(1)-C(1) / Å                 | 2.152(10)  | 2.1484              | 2.1386   | 2.1638   |
| E(2)-C(9) / Å                 | 1.943(11)  | 1.9439              | 1.9638   | 1.9405   |
| C(10)-C(1)-E(1)-C(13); θ1 / ° | -168.14(1) | 75.092              | 81.843   | -173.618 |
| C(10)-C(9)-E(2)-C(19); θ2 / ° | 101.19(1)  | 85.768              | 169.922  | -98.243  |
| C(1)-E(1)-C(13)-C(14); γ1 / ° | 83.63(1)   | -151.654            | -152.943 | 88.938   |
| C(9)-E(2)-C(19)-C(20); γ2 / ° | 160.85(1)  | 176.127             | 99.097   | -149.412 |

<sup>a</sup> Distances in Å, angles in degrees, relative energies in kJ/mol.

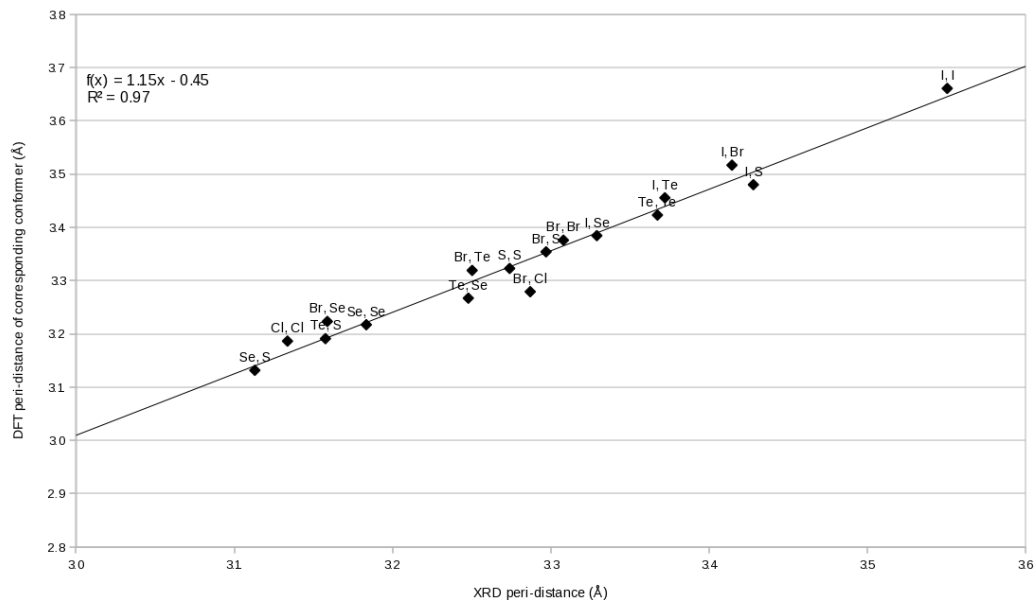

5

**Figure S1:** Plot of optimised (B3LYP) vs. observed (X-ray diffraction) *peri*-distances in acenaphthene derivatives.

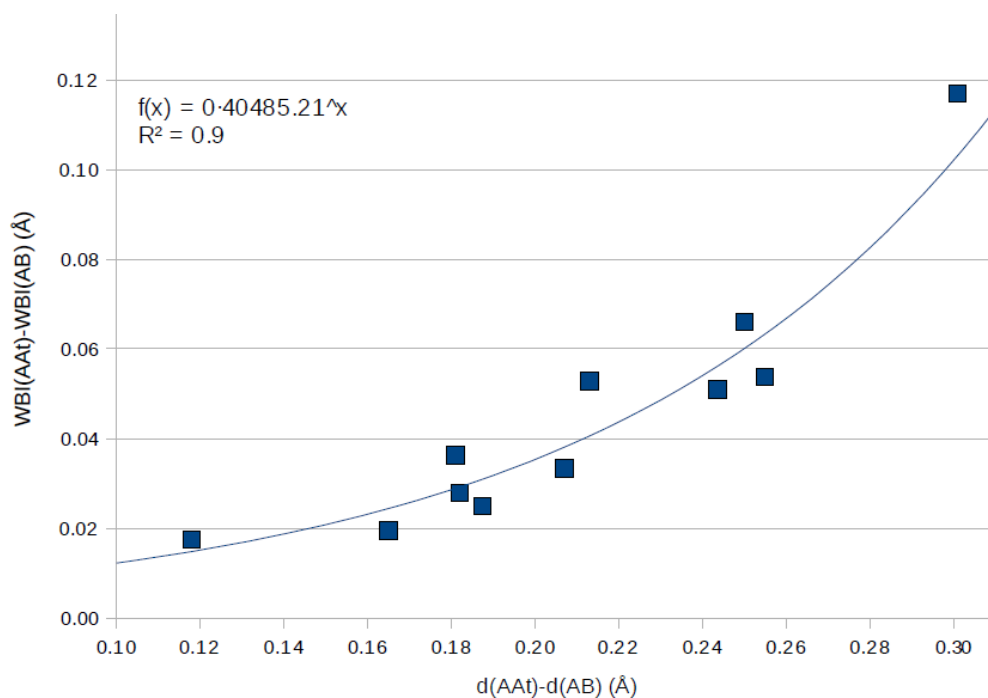

**Figure S2:** Plot of the increase in the Wiberg bond index on going from AAt to AB conformers vs the concomitant contraction of the peri-distance (in Å, acenaphthene series). The more pronounced this bond contraction, the higher the covalent contribution.

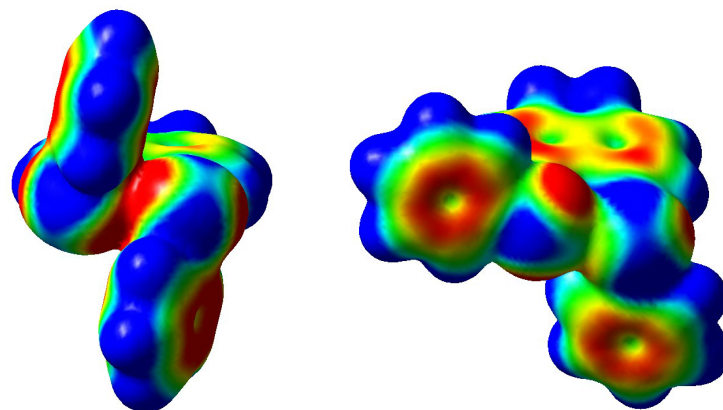

**Figure S3:** Plot of the electrostatic potential of A9-AAt (left) and A9-AB (right), mapped onto isodensity surfaces ( $\rho = 4 \cdot 10^{-3}$  au); color code: red 50 kJ/mol; green: zero; blue -50 kJ/mol.





**Table S3:** Selected optimised parameters, WBIs, and relative energies of naphthalene derivatives **N1-N6** (B3LYP level), including structural data from X-ray crystallography, where available.

| <b>Compound</b>                       | <b>N1 (Oil)</b> | <b>N1-A</b> | <b>N1-B</b>     |                 |             |  |
|---------------------------------------|-----------------|-------------|-----------------|-----------------|-------------|--|
| X, EPh                                | Br, SPh         | Br, SPh     | Br, SPh         |                 |             |  |
| Energy(rel)* / kJ/mol                 | -               | 3.04        | 0.00            |                 |             |  |
| X(1)···E(1)                           | -               | 3.2879      | 3.1314          |                 |             |  |
| WBI X(1)···E(1)                       | -               | 0.0066      | 0.0290          |                 |             |  |
| X(1)-C(1)                             | -               | 1.9280      | 1.9303          |                 |             |  |
| E(1)-C(9)                             | -               | 1.8001      | 1.8109          |                 |             |  |
| C(10)-C(9)-E(1)-C(11); $\theta$ 1 / ° | -               | 76.897      | 158.707         |                 |             |  |
| C(9)-E(1)-C(11)-C(12); $\gamma$ 1 / ° | -               | 18.536      | 109.227         |                 |             |  |
| <b>Compound</b>                       | <b>N2 XRD-B</b> | <b>N2-A</b> | <b>N2-B</b>     | <b>N3 XRD-B</b> | <b>N3-B</b> |  |
| X, EPh                                | Br, SePh        | Br, SePh    | Br, SePh        | Br, TePh        | Br, TePh    |  |
| Energy(rel)* / kJ/mol                 | -               | 9.85        | 0.00            | -               | 0.00        |  |
| X(1)···E(1)                           | 3.1136(6)       | 3.3689      | 3.1731          | 3.1909(10)      | 3.2664      |  |
| WBI X(1)···E(1)                       | -               | 0.0086      | 0.0454          | -               | 0.0675      |  |
| X(1)-C(1)                             | 1.919(3)        | 1.9268      | 1.9297          | 1.917(6)        | 1.9316      |  |
| E(1)-C(9)                             | 1.948(3)        | 1.9505      | 1.9655          | 2.153(6)        | 2.1704      |  |
| C(10)-C(9)-E(1)-C(11); $\theta$ 1 / ° | -159.2(3)       | -71.119     | 159.200         | -160.0(6)       | 162.873     |  |
| C(9)-E(1)-C(11)-C(12); $\gamma$ 1 / ° | -96.0(3)        | -25.459     | 105.765         | -99.4(5)        | 100.731     |  |
| <b>Compound</b>                       | <b>N4 XRD-A</b> | <b>N4-C</b> | <b>N5 XRD-B</b> | <b>N5-C</b>     |             |  |
| X, EPh                                | I, SPh          | I, SPh      | I, SePh         | I, SePh         |             |  |
| Energy(rel)* / kJ/mol                 | -               | 0.00        | -               | 0.00            |             |  |
| X(1)···E(1)                           | 3.338(11)       | 3.2973      | 3.2524(8)       | 3.3355          |             |  |
| WBI X(1)···E(1)                       | -               | 0.0354      | -               | 0.0566          |             |  |
| X(1)-C(1)                             | 2.118(11)       | 2.1538      | 2.122(4)        | 1.9641          |             |  |
| E(1)-C(9)                             | 1.765(11)       | 1.8096      | 1.958(4)        | 2.1519          |             |  |
| C(10)-C(9)-E(1)-C(11); $\theta$ 1 / ° | 83.6(10)        | 148.508     | -157.0(4)       | 151.829         |             |  |
| C(9)-E(1)-C(11)-C(12); $\gamma$ 1 / ° | 1.4(10)         | 116.268     | -89.4(4)        | -76.273         |             |  |
| <b>Compound</b>                       | <b>N6 XRD-B</b> | <b>N6-B</b> |                 |                 |             |  |
| X, EPh                                | I, TePh         | I, TePh     |                 |                 |             |  |
| Energy(rel)* / kJ/mol                 | -               | 0.00        |                 |                 |             |  |
| X(1)···E(1)                           | 3.3146(6)       | 3.4253      |                 |                 |             |  |
| WBI X(1)···E(1)                       | -               | 0.0867      |                 |                 |             |  |
| X(1)-C(1)                             | 2.108(6)        | 2.1518      |                 |                 |             |  |
| E(1)-C(9)                             | 2.151(6)        | 2.1687      |                 |                 |             |  |
| C(10)-C(9)-E(1)-C(11); $\theta$ 1 / ° | -158.1(6)       | 152.606     |                 |                 |             |  |
| C(9)-E(1)-C(11)-C(12); $\gamma$ 1 / ° | -86.5(5)        | -78.210     |                 |                 |             |  |

<sup>a</sup> Distances in Å, angles in degrees, relative energies in kJ/mol.



**Table S4:** Selected optimised parameters, WBIs, and relative energies of naphthalene derivatives **N7-N12** (B3LYP level), including structural data from X-ray crystallography, where available).

| <b>Compound</b>                            | <b>N7 XRD-AB</b> | <b>N7-AA<sub>t</sub></b> | <b>N7-AB</b> | <b>N7-CC<sub>t</sub></b> |
|--------------------------------------------|------------------|--------------------------|--------------|--------------------------|
| Eph, E'Ph                                  | SPh, SPh         | SPh, SPh                 | SPh, SPh     | SPh, SPh                 |
| Energy(rel)* / kJ/mol                      | -                | 5.93                     | 0.00         | 0.69                     |
| E(1)···E(2)                                | 3.0036(13)       | 3.2533                   | 3.0498       | 3.0071                   |
| WBI E(1)···E(2)                            | -                | 0.0099                   | 0.0396       | 0.0446                   |
| E(1)-C(1)                                  | 1.794(3)         | 1.8000                   | 1.8099       | 1.8092                   |
| E(2)-C(9)                                  | 1.783(4)         | 1.8000                   | 1.7977       | 1.8095                   |
| C(10)-C(1)-E(1)-C(11); $\theta_1 / ^\circ$ | 159.8(2)         | 76.041                   | -179.798     | 138.628                  |
| C(10)-C(9)-E(2)-C(17); $\theta_2 / ^\circ$ | 95.0(3)          | 76.040                   | 81.680       | 138.761                  |
| C(1)-E(1)-C(11)-C(12); $\gamma_1 / ^\circ$ | -73.62(1)        | 13.345                   | 92.056       | -60.353                  |
| C(9)-E(2)-C(17)-C(18); $\gamma_2 / ^\circ$ | -24.10(1)        | 13.351                   | 12.741       | 124.984                  |

  

| <b>Compound</b>                            | <b>N8 XRD-AB</b> | <b>N8-AA<sub>t</sub></b> | <b>N8-AB</b> | <b>N8-CC<sub>t</sub></b> |
|--------------------------------------------|------------------|--------------------------|--------------|--------------------------|
| Eph, E'Ph                                  | SePh, SePh       | SePh, SePh               | SePh, SePh   | SePh, SePh               |
| Energy(rel)* / kJ/mol                      | -                | 15.18                    | 1.52         | 0.00                     |
| E(1)···E(2)                                | 3.1332(9)        | 3.4140                   | 3.1522       | 3.1171                   |
| WBI E(1)···E(2)                            | -                | 0.0140                   | 0.0□81       | 0.0821                   |
| E(1)-C(1)                                  | 1.922(7)         | 1.9494                   | 1.9660       | 1.9594                   |
| E(2)-C(9)                                  | 1.930(7)         | 1.9494                   | 1.9449       | 1.9576                   |
| C(10)-C(1)-E(1)-C(11); $\theta_1 / ^\circ$ | 155.35(1)        | 65.404                   | 159.999      | 136.310                  |
| C(10)-C(9)-E(2)-C(17); $\theta_2 / ^\circ$ | -109.990         | 65.402                   | -107.051     | 131.088                  |
| C(1)-E(1)-C(11)-C(12); $\gamma_1 / ^\circ$ | -83.57(1)        | 35.143                   | -80.441      | -63.715                  |
| C(9)-E(2)-C(17)-C(18); $\gamma_2 / ^\circ$ | 10.88(1)         | 35.068                   | -155.136     | -59.079                  |

  

| <b>Compound</b>                            | <b>N9 XRD-CC<sub>t</sub></b> | <b>N9-CC<sub>c</sub></b> | <b>N9-CC<sub>t</sub></b> |
|--------------------------------------------|------------------------------|--------------------------|--------------------------|
| Eph, E'Ph                                  | TePh, TePh                   | TePh, TePh               | TePh, TePh               |
| Energy(rel)* / kJ/mol                      | -                            | 3.25                     | 0.00                     |
| E(1)···E(2)                                | 3.287(1)                     | 3.3907                   | 3.3408                   |
| WBI E(1)···□(2)                            | -                            | 0.1407                   | 0.1497                   |
| E(1)-C(1)                                  | 2.14(1)                      | 2.1720                   | 2.1574                   |
| E(2)-C(9)                                  | 2.14(2)                      | 2.1449                   | 2.1575                   |
| C(10)-C(1)-E(1)-C(11); $\theta_1 / ^\circ$ | -124.79(1)                   | -118.985                 | -129.438                 |
| C(10)-C(9)-E(2)-C(17); $\theta_2 / ^\circ$ | -132.46(1)                   | 152.358                  | -129.469                 |
| C(1)-E(1)-C(11)-C(12); $\gamma_1 / ^\circ$ | 100.88(1)                    | -127.785                 | □117.102                 |
| C(9)-E(2)-C(17)-C(18); $\gamma_2 / ^\circ$ | 57.21(1)                     | -77.057                  | 65.924                   |

  

| <b>Compound</b>                            | <b>N10 XRD-BA</b> | <b>N10-AA<sub>t</sub></b> | <b>N10-BA</b> |
|--------------------------------------------|-------------------|---------------------------|---------------|
| Eph, E'Ph                                  | SePh, SPh         | SePh, SPh                 | SePh, SPh     |
| Energy(rel)* / kJ/mol                      | -                 | 15.11                     | 0.00          |
| E(1)···E(2)                                | 3.063(2)          | 3.3326                    | 3.0567        |
| WBI E(1)···E(2)                            | -                 | 0.0118                    | 0.0676        |
| E(1)-C(1□)                                 | 1.907(9)          | 1.9517                    | 1.9642        |
| E(2)-C(9)                                  | 1.813(8)          | 1.7985                    | 1.7959        |
| C(10)-C(1)-E(1)-C(11); $\theta_1 / ^\circ$ | -156.4(7)         | 66.787                    | 168.716       |
| C(10)-C(9)-E(2)-C(17); $\theta_2 / ^\circ$ | 111.3(7)          | 69.547                    | 91.079        |
| C(1)-E(1)-C(11)-C(12); $\gamma_1 / ^\circ$ | -98.0(8)          | -145.834                  | 100.267       |
| C(9)-E(2)-C(17)-C(18); $\gamma_2 / ^\circ$ | -9.3(9)           | -157.852                  | 174.732       |

| Compound                                   | N11 XRD-BA | N11-BA    | N12 XRD-BA | N12-BA     |
|--------------------------------------------|------------|-----------|------------|------------|
| Eph, E'Ph                                  | TePh, SPh  | TePh, SPh | TePh, SePh | TePh, SePh |
| Energy(rel)* / kJ/mol                      | -          | 0.00      | -          | 0.00       |
| E(1)⋯E(2)                                  | 3.0684(13) | 3.1202    | 3.1919(11) | 3.2035     |
| WBI E(1)⋯E(2)                              | -          | 0.1028    | -          | 0.1295     |
| E(1)-C(1)                                  | 2.141(5)   | 2.1649    | 2.137(11)  | 2.1681     |
| E(2)-C(9)                                  | 1.770(5)   | 1.7954    | 1.920(12)  | 1.9444     |
| C(10)-C(1)-E(1)-C(11); $\theta 1 / ^\circ$ | -160.5(11) | 169.653   | -165.3(5)  | 164.033    |
| C(10)-C(9)-E(2)-C(17); $\theta 2 / ^\circ$ | -83.1(11)  | 94.898    | -84.0(5)   | 95.389     |
| C(1)-E(1)-C(11)-C(12); $\gamma 1 / ^\circ$ | 108.0(11)  | 97.895    | -89.5(4)   | -83.532    |
| C(9)-E(2)-C(17)-C(18); $\gamma 2 / ^\circ$ | -12.3(9)   | -10.877   | -12.5(□)   | -32.494    |

<sup>a</sup> Distances in Å, angles in degrees, relative energies in kJ/mol.

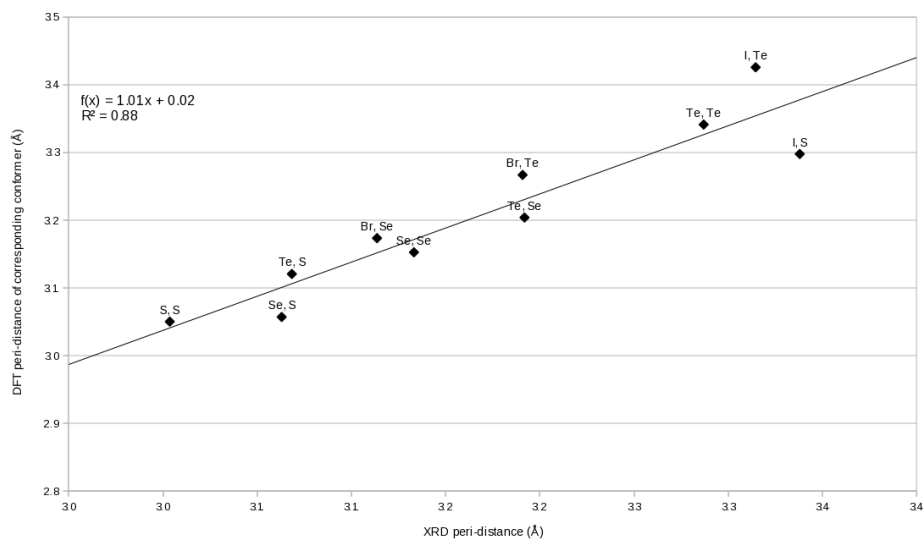

**Figure S4:** Plot of optimised (B3LYP) vs. observed (X-ray diffraction) *peri*-distances in naphthalene derivatives.

5

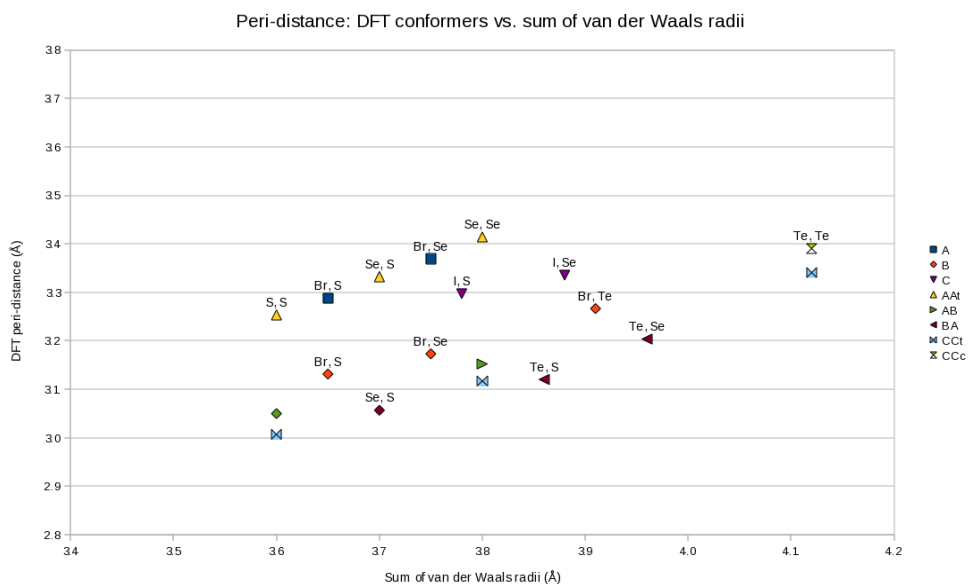

**Figure S5:** Plot of B3LYP optimised *peri*-distances vs. sum of van der Waals radii in the naphthalene series. Note that no A or AA minima could be located for any of the I and Te compounds - the optimisations went directly to B, C, AB or CC conformers.

### 3. Crystal structure analyses

X-ray crystal structures for **A1-A7**, **A9**, **A10**, **A12**, **A14** and **A15** were determined at -148(1) °C on the St Andrews Robotic Diffractometer<sup>17</sup> a Rigaku ACTOR-SM, Saturn 724 CCD area detector with graphite monochromated Mo-K $\alpha$  radiation ( $\lambda = 0.71073$  Å). Data for compound **A8** were collected at -180(1) °C by using a Rigaku MM007 High brilliance RA generator (Mo K $\alpha$  radiation, confocal optic) and Mercury CCD system. At least a full hemisphere of data was collected using  $\omega$  scans. Data for compound **A11** were collected at -180(1) °C by using a Rigaku MM007 High brilliance RA generator (Mo K $\alpha$  radiation, confocal optic) and Saturn CCD system. At least a full hemisphere of data was collected using  $\omega$  scans. Data for compound **A16** were collected at -148(1) °C on a Rigaku SCXmini CCD area detector with graphite monochromated Mo K $\alpha$  radiation ( $\lambda = 0.71073$  Å). All data had intensities corrected for Lorentz, polarisation and absorption. The data for the complexes was collected and processed using CrystalClear (Rigaku).<sup>18</sup> The structures were solved by Patterson or direct methods and expanded using Fourier techniques. Non-hydrogen atoms were refined anisotropically, and hydrogen atoms were refined using a riding model. All calculations were performed using the CrystalStructure<sup>19</sup> and SHELXL-97.<sup>20</sup> These X-ray data can be obtained free of charge via [www.ccdc.cam.ac.uk/conts/retrieving.html](http://www.ccdc.cam.ac.uk/conts/retrieving.html) or from the Cambridge Crystallographic Data centre, 12 Union Road, Cambridge CB2 1EZ, UK; fax (+44) 1223-336-033; e-mail: [deposit@ccdc.cam.ac.uk](mailto:deposit@ccdc.cam.ac.uk) CCDC Nos: A1-A12 816080-81691, A14-A16 816091-816094.

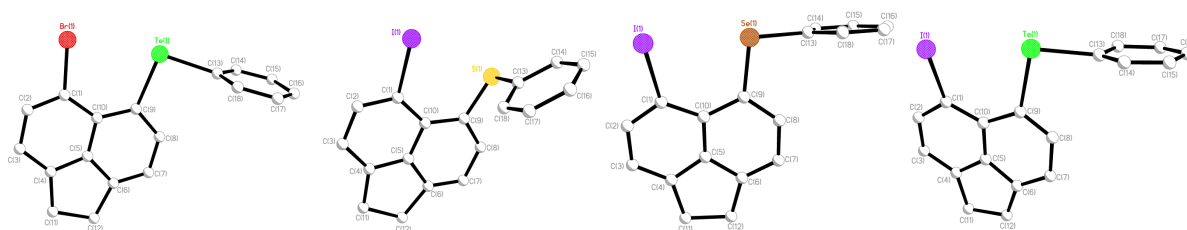

Fig. S6 Molecular structures of **A3-A6** (H atoms omitted for clarity).

20

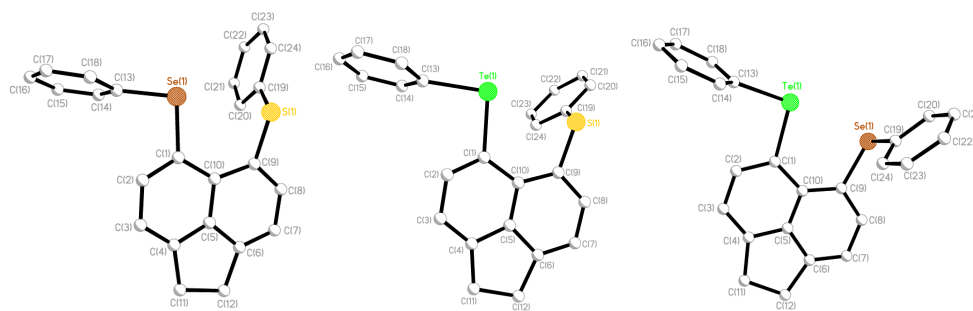

Fig. S7 Molecular structures of **A10-A12** (H atoms omitted for clarity).

25



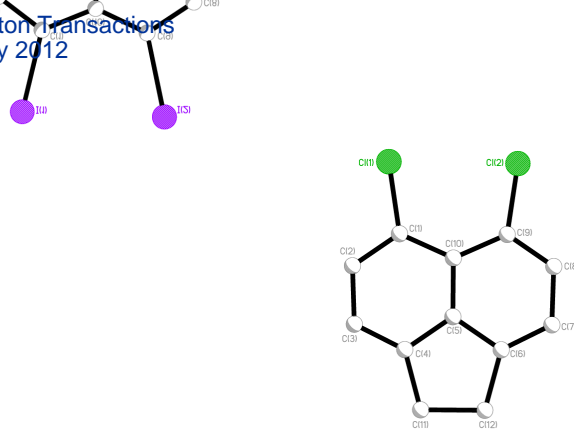

**Fig. S8** Molecular structures of **A14** and **A16** (H atoms omitted for clarity).

**Table S5** Selected interatomic distances [Å] and angles [°] for Acenap[X][EPh] compounds **A1-A6** [values in parentheses are for independent molecules]

| Compound                                       | A1               | A2                | A3                | A4               | A5                | A6                             |
|------------------------------------------------|------------------|-------------------|-------------------|------------------|-------------------|--------------------------------|
| X, EPh                                         | Br,SPh           | Br,SePh           | Br,TePh           | I,SPh            | I,SePh            | I,TePh                         |
| <i>Peri-region-distances</i>                   |                  |                   |                   |                  |                   |                                |
| <b>X(1)···E(1)</b>                             | <b>3.297(3)</b>  | <b>3.1588(16)</b> | <b>3.2503(14)</b> | <b>3.428(4)</b>  | <b>3.3291(11)</b> | <b>3.3721(17) [3.3774(17)]</b> |
| $\Sigma r_{vdw} - X \cdots E^a$                | 0.353            | 0.5912            | 0.6597            | 0.352            | 0.5509            | 0.6679 [0.6626]                |
| % $\Sigma r_{vdw}^a$                           | 90               | 84                | 83                | 91               | 86                | 83 [84]                        |
| <b>X(1)-C(1)</b>                               | 1.926(7)         | 1.905(5)          | 1.919(10)         | 2.129(13)        | 2.110(7)          | 2.058(16) [2.067(16)]          |
| <b>E(1)-C(9)</b>                               | 1.777(7)         | 1.943(5)          | 2.148(10)         | 1.773(14)        | 1.930(7)          | 2.176(17) [2.151(18)]          |
| <i>Acenaphthene bond lengths</i>               |                  |                   |                   |                  |                   |                                |
| <b>C(1)-C(2)</b>                               | 1.383(10)        | 1.361(8)          | 1.369(14)         | 1.388(17)        | 1.360(10)         | 1.37(2) [1.40(2)]              |
| <b>C(2)-C(3)</b>                               | 1.387(10)        | 1.429(8)          | 1.389(16)         | 1.42(2)          | 1.407(11)         | 1.37(3) [1.37(3)]              |
| <b>C(3)-C(4)</b>                               | 1.355(11)        | 1.362(8)          | 1.376(16)         | 1.399(18)        | 1.368(11)         | 1.39(3) [1.45(2)]              |
| <b>C(4)-C(5)</b>                               | 1.411(9)         | 1.416(8)          | 1.415(14)         | 1.423(17)        | 1.401(9)          | 1.41(2) [1.39(2)]              |
| <b>C(5)-C(10)</b>                              | 1.421(9)         | 1.423(7)          | 1.434(14)         | 1.438(17)        | 1.417(9)          | 1.43(2) [1.42(2)]              |
| <b>C(5)-C(6)</b>                               | 1.434(10)        | 1.405(8)          | 1.420(15)         | 1.433(17)        | 1.428(9)          | 1.42(2) [1.40(2)]              |
| <b>C(6)-C(7)</b>                               | 1.358(10)        | 1.367(8)          | 1.364(15)         | 1.344(19)        | 1.361(10)         | 1.40(2) [1.37(2)]              |
| <b>C(7)-C(8)</b>                               | 1.385(10)        | 1.405(8)          | 1.409(14)         | 1.422(20)        | 1.390(10)         | 1.44(2) [1.39(2)]              |
| <b>C(8)-C(9)</b>                               | 1.396(11)        | 1.377(8)          | 1.396(14)         | 1.378(18)        | 1.391(10)         | 1.34(2) [1.38(2)]              |
| <b>C(9)-C(10)</b>                              | 1.437(9)         | 1.438(8)          | 1.434(13)         | 1.444(17)        | 1.444(9)          | 1.44(2) [1.47(2)]              |
| <b>C(10)-C(1)</b>                              | 1.442(10)        | 1.431(8)          | 1.411(13)         | 1.444(17)        | 1.433(10)         | 1.44(2) [1.43(2)]              |
| <b>C(4)-C(11)</b>                              | 1.536(10)        | 1.514(8)          | 1.505(15)         | 1.53(2)          | 1.513(10)         | 1.50(3) [1.50(2)]              |
| <b>C(11)-C(12)</b>                             | 1.536(11)        | 1.562(9)          | 1.538(17)         | 1.563(19)        | 1.545(11)         | 1.48(3) [1.53(3)]              |
| <b>C(12)-C(6)</b>                              | 1.535(9)         | 1.510(8)          | 1.488(17)         | 1.529(17)        | 1.510(10)         | 1.45(2) [1.52(2)]              |
| <i>Peri-region bond angles</i>                 |                  |                   |                   |                  |                   |                                |
| <b>X(1)-C(1)-C(10)</b>                         | 122.3(5)         | 121.8(4)          | 121.6(7)          | 125.3(9)         | 123.8(5)          | 124.6(12) [123.7(11)]          |
| <b>C(1)-C(10)-C(9)</b>                         | 132.5(6)         | 131.4(5)          | 131.7(9)          | 132.6(12)        | 131.4(6)          | 130.5(15) [130.3(14)]          |
| <b>E(1)-C(9)-C(10)</b>                         | 125.5(6)         | 121.4(4)          | 123.5(7)          | 124.4(10)        | 122.3(5)          | 123.2(12) [124.4(10)]          |
| <b><math>\Sigma</math> of bay angles</b>       | <b>380.3(11)</b> | <b>74.6(9)</b>    | <b>376.8(15)</b>  | <b>382.3(20)</b> | <b>377.5(11)</b>  | <b>378.3(32) [378.4(28)]</b>   |
| <b>Splay angle<sup>b</sup></b>                 | 20.3             | 14.6              | 16.8              | 22.3             | 17.5              | 18.3 [18.4]                    |
| <b>C(4)-C(5)-C(6)</b>                          | 112.1(6)         | 111.4(5)          | 110.8(9)          | 111.9(10)        | 111.1(6)          | 110.4(15) [109.8(14)]          |
| <b>X(1)-E(1)-C(13)</b>                         | 87.4(1)          | 172.83(1)         | 169.0(1)          | 86.46(1)         | 177.69(1)         | 171.31(1) [171.48(1)]          |
| <i>Out-of-plane displacement</i>               |                  |                   |                   |                  |                   |                                |
| <b>X(1)</b>                                    | 0.149(1)         | 0.287(1)          | 0.307(1)          | -0.201(1)        | -0.439(1)         | -0.425(1) [0.333(1)]           |
| <b>E(1)</b>                                    | -0.121(1)        | -0.359(1)         | -0.298(1)         | 0.092(1)         | 0.364(1)          | 0.334(1) [-0.395(1)]           |
| <i>Central naphthalene ring torsion angles</i> |                  |                   |                   |                  |                   |                                |
| <b>C:(6)-(5)-(10)-(1)</b>                      | 178.76(1)        | 175.27(1)         | 178.17(1)         | 179.40(1)        | 174.34(1)         | 175.29(1) [175.81(1)]          |
| <b>C:(4)-(5)-(10)-(9)</b>                      | 176.84(1)        | 177.24(1)         | 176.39(1)         | 177.51(1)        | 177.91(1)         | -177.33(1) [178.08(1)]         |

<sup>a</sup> van der Waals radii used for calculations:  $r_{vdW}(S)$  1.80Å,  $r_{vdW}(Se)$  1.90Å,  $r_{vdW}(Te)$  2.06Å,  $r_{vdW}(Br)$  1.85 Å,  $r_{vdW}(I)$  1.98 Å;<sup>21</sup> <sup>b</sup> Splay angle:  $\Sigma$  of the three bay region angles – 360.

**Table S6** Selected interatomic distances [Å] and angles [°] for Acenap[EPh][E'Ph] compounds **A7-A12** [values in parentheses are for independent molecules]

| Compound                                       | A7                           | A8                | A9                | A10              | A11               | A12               |
|------------------------------------------------|------------------------------|-------------------|-------------------|------------------|-------------------|-------------------|
| EPh, E'Ph                                      | SPh,SPh                      | SePh,SePh         | TePh,TePh         | SePh,SPh         | TePh,SPh          | TePh,SePh         |
| <i>Peri-region-distances</i>                   |                              |                   |                   |                  |                   |                   |
| E(1)⋯E(2)                                      | <b>3.274(4)</b> [3.289(4)]   | <b>3.1834(10)</b> | <b>3.3674(19)</b> | <b>3.113(4)</b>  | <b>3.1576(15)</b> | <b>3.2479(19)</b> |
| $\Sigma r_{vdW} - E \cdots E^a$                | 0.326 [0.311]                | 0.6166            | 0.7526            | 0.5870           | 0.7024            | 0.7121            |
| % $\Sigma r_{vdW}^a$                           | 91 [91]                      | 84                | 82                | 84               | 82                | 82                |
| E(1)-C(1)                                      | 1.812(12) [1.776(11)]        | 1.928(9)          | 2.180(17)         | 1.953(10)        | 2.138(6)          | 2.152(10)         |
| E(2)-C(9)                                      | 1.782(11) [1.804(12)]        | 1.932(8)          | 2.155(17)         | 1.798(11)        | 1.781(7)          | 1.943(11)         |
| <i>Acenaphthene bond lengths</i>               |                              |                   |                   |                  |                   |                   |
| C(1)-C(2)                                      | 1.393(16) [1.402(15)]        | 1.372(12)         | 1.367(19)         | 1.393(15)        | 1.363(8)          | 1.397(14)         |
| C(2)-C(3)                                      | 1.411(17) [1.405(17)]        | 1.411(12)         | 1.43(3)           | 1.424(14)        | 1.417(9)          | 1.404(15)         |
| C(3)-C(4)                                      | 1.313(18) [1.380(17)]        | 1.371(12)         | 1.36(2)           | 1.350(16)        | 1.371(9)          | 1.351(16)         |
| C(4)-C(5)                                      | 1.432(16) [1.406(15)]        | 1.420(12)         | 1.410(17)         | 1.404(15)        | 1.420(8)          | 1.422(16)         |
| C(5)-C(10)                                     | 1.437(17) [1.431(15)]        | 1.423(12)         | 1.43(2)           | 1.450(14)        | 1.427(8)          | 1.428(14)         |
| C(5)-C(6)                                      | 1.431(16) [1.403(16)]        | 1.425(12)         | 1.443(20)         | 1.423(16)        | 1.415(8)          | 1.409(16)         |
| C(6)-C(7)                                      | 1.372(18) [1.383(17)]        | 1.364(12)         | 1.318(19)         | 1.367(16)        | 1.354(9)          | 1.371(17)         |
| C(7)-C(8)                                      | 1.415(18) [1.458(18)]        | 1.412(12)         | 1.42(3)           | 1.406(15)        | 1.416(9)          | 1.405(17)         |
| C(8)-C(9)                                      | 1.411(17) [1.365(17)]        | 1.372(12)         | 1.38(2)           | 1.361(17)        | 1.371(9)          | 1.395(16)         |
| C(9)-C(10)                                     | 1.400(16) [1.472(16)]        | 1.444(12)         | 1.430(18)         | 1.451(15)        | 1.426(9)          | 1.424(15)         |
| C(10)-C(1)                                     | 1.442(17) [1.458(15)]        | 1.425(12)         | 1.43(2)           | 1.434(16)        | 1.446(8)          | 1.447(15)         |
| C(4)-C(11)                                     | 1.548(16) [1.516(17)]        | 1.520(12)         | 1.50(2)           | 1.522(15)        | 1.499(9)          | 1.538(15)         |
| C(11)-C(12)                                    | 1.536(17) [1.572(16)]        | 1.570(12)         | 1.545(18)         | 1.568(17)        | 1.557(9)          | 1.547(17)         |
| C(12)-C(6)                                     | 1.529(16) [1.470(16)]        | 1.509(12)         | 1.55(2)           | 1.525(15)        | 1.505(9)          | 1.506(15)         |
| <i>Peri-region bond angles</i>                 |                              |                   |                   |                  |                   |                   |
| E(1)-C(1)-C(10)                                | 124.3(9) [126.3(8)]          | 123.4(6)          | 123.9(10)         | 120.7(7)         | 121.5(4)          | 123.1(7)          |
| C(1)-C(10)-C(9)                                | 131.8(11) [129.2(10)]        | 131.1(8)          | 131.7(16)         | 131.3(9)         | 131.2(5)          | 130.6(9)          |
| E(2)-C(9)-C(10)                                | 125.1(9) [124.3(9)]          | 122.0(6)          | 122.8(12)         | 120.7(8)         | 122.3(5)          | 123.4(8)          |
| $\Sigma$ of bay angles                         | <b>381.2(24)</b> [379.8(22)] | <b>376.5(13)</b>  | <b>378.4(24)</b>  | <b>372.7(16)</b> | <b>375.0(10)</b>  | <b>377.1(16)</b>  |
| Splay angle <sup>b</sup>                       | 21.2 (19.8)                  | 16.5              | 18.4              | 12.7             | 15.0              | 17.1              |
| C(4)-C(5)-C(6)                                 | 111.4(10) [111.8(10)]        | 110.5(7)          | 113.3(14)         | 113.4(9)         | 111.1(5)          | 112.2(9)          |
| E(2)-E(1)-C(13)                                | 75.14(1) [73.91(1)]          | 171.28(1)         | 174.0(4)          | 167.95(1)        | 167.86(1)         | 172.82(1)         |
| E(1)-E(2)-C(19)                                | 85.76(1) [84.55(1)]          | 91.48(1)          | 94.1(4)           | 86.58(1)         | 91.70(1)          | 94.13(1)          |
| <i>Out-of-plane displacement</i>               |                              |                   |                   |                  |                   |                   |
| E(1)                                           | -0.132(1) [0.194(1)]         | 0.176(1)          | 0.310(1)          | 0.274(1)         | 0.176(1)          | -0.403(1)         |
| E(2)                                           | 0.161(1) [-0.128(1)]         | -0.193(1)         | -0.404(1)         | -0.416(1)        | -0.063(1)         | 0.032(1)          |
| <i>Central naphthalene ring torsion angles</i> |                              |                   |                   |                  |                   |                   |
| C:(6)-(5)-(10)-(1)                             | -176.50(1) [177.94(1)]       | 178.40(1)         | 176.19(1)         | 175.14(1)        | 179.22(1)         | 179.41(1)         |
| C:(4)-(5)-(10)-(9)                             | 178.82(1) [-176.17(1)]       | 179.23(1)         | 179.03(1)         | 174.65(1)        | 176.81(1)         | 176.12(1)         |

<sup>a</sup> van der Waals radii used for calculations:  $r_{vdW}(S)$  1.80Å,  $r_{vdW}(Se)$  1.90Å,  $r_{vdW}(Te)$  2.06Å;<sup>21</sup> <sup>b</sup> Splay angle:  $\Sigma$  of the three bay region angles – 360.

**Table S7** Selected interatomic distances [Å] and angles [°] for Acenap[X][X'] (X/X' = I/I, I/Br, Cl/Cl) compounds **A14-A16** [compared to known structures Acenap[X][X'] (X/X' = Br/Br, Br/Cl) **A13** and **A17**]

| Compound | A14 | A15  | A16   | A13 <sup>22</sup> | A17 <sup>23</sup> |
|----------|-----|------|-------|-------------------|-------------------|
| X X'     | I I | I Br | Cl Cl | Br Br             | Br Cl             |



*Peri-region-distances*

|                                 |                   |                   |                   |                 |                 |
|---------------------------------|-------------------|-------------------|-------------------|-----------------|-----------------|
| X(1)···X(2)                     | <b>3.5505(12)</b> | <b>3.4145(18)</b> | <b>3.1336(11)</b> | <b>3.308(1)</b> | <b>3.287(1)</b> |
| $\Sigma r_{vdw} - X \cdots X^a$ | 0.4095            | 0.4155            | 0.3664            | 0.392           | 0.313           |
| % $\Sigma r_{vdw}^a$            | 90                | 89                | 90                | 89              | 91              |
| X(1)-C(1)                       | 2.108(6)          | 2.041(10)         | 1.750(2)          | 1.905(1)        | 1.893(1)        |
| X(2)-C(9)                       | 2.107(6)          | 2.032(9)          | 1.754(2)          | 1.906(1)        | 1.938(1)        |

*Acenaphthene bond lengths*

|             |           |           |          |          |          |
|-------------|-----------|-----------|----------|----------|----------|
| C(1)-C(2)   | 1.371(10) | 1.340(19) | 1.376(4) | 1.381(1) | 1.384(1) |
| C(2)-C(3)   | 1.389(10) | 1.413(18) | 1.411(3) | 1.407(1) | 1.450(1) |
| C(3)-C(4)   | 1.386(11) | 1.352(17) | 1.367(4) | 1.364(1) | 1.370(1) |
| C(4)-C(5)   | 1.405(10) | 1.426(14) | 1.412(4) | 1.415(1) | 1.447(1) |
| C(5)-C(10)  | 1.427(8)  | 1.389(12) | 1.418(3) | 1.425(1) | 1.508(1) |
| C(5)-C(6)   | 1.419(10) | 1.398(16) | 1.417(3) | 1.415(1) | 1.462(1) |
| C(6)-C(7)   | 1.359(11) | 1.402(16) | 1.364(4) | 1.366(1) | 1.415(1) |
| C(7)-C(8)   | 1.411(10) | 1.438(14) | 1.408(3) | 1.411(1) | 1.420(1) |
| C(8)-C(9)   | 1.397(11) | 1.373(16) | 1.370(3) | 1.377(1) | 1.419(1) |
| C(9)-C(10)  | 1.420(10) | 1.414(15) | 1.424(4) | 1.432(1) | 1.420(1) |
| C(10)-C(1)  | 1.443(10) | 1.492(15) | 1.430(3) | 1.427(1) | 1.446(1) |
| C(4)-C(11)  | 1.508(10) | 1.562(16) | 1.507(3) | 1.511(1) | 1.435(1) |
| C(11)-C(12) | 1.559(12) | 1.530(19) | 1.554(4) | 1.549(1) | 1.563(1) |
| C(12)-C(6)  | 1.503(10) | 1.500(14) | 1.512(4) | 1.509(1) | 1.421(1) |

*Peri-region bond angles*

|                          |                  |                  |                 |                  |                  |
|--------------------------|------------------|------------------|-----------------|------------------|------------------|
| X(1)-C(1)-C(10)          | 125.6(5)         | 124.4(7)         | 122.5(2)        | 123.94(1)        | 119.77(1)        |
| C(1)-C(10)-C(9)          | 132.7(6)         | 131.2(8)         | 132.1(2)        | 132.65(1)        | 138.25(1)        |
| X(2)-C(9)-C(10)          | 126.9(5)         | 125.9(7)         | 122.51(17)      | 124.20(1)        | 120.10(1)        |
| $\Sigma$ of bay angles   | <b>385.2(13)</b> | <b>381.5(18)</b> | <b>377.1(5)</b> | <b>380.79(1)</b> | <b>378.12(3)</b> |
| Splay angle <sup>b</sup> | 25.2             | 21.5             | 17.1            | 20.8             | 18.1             |
| C(4)-C(5)-C(6)           | 110.2(6)         | 110.1(8)         | 111.3(2)        | 110.89(1)        | 109.40(1)        |

*Out-of-plane displacement*

|      |           |           |           |           |           |
|------|-----------|-----------|-----------|-----------|-----------|
| X(1) | 0.098(1)  | -0.067(1) | -0.067(1) | -0.027(1) | -0.117(1) |
| X(2) | -0.146(1) | 0.098(1)  | 0.114(1)  | 0.074(1)  | 0.053(1)  |

*Central naphthalene ring torsion angles*

|                   |           |            |            |            |            |
|-------------------|-----------|------------|------------|------------|------------|
| C(6)-(5)-(10)-(1) | 179.13(1) | 179.12(1)  | -178.19(1) | -179.29(1) | 179.35(1)  |
| C(4)-(5)-(10)-(9) | 179.25(1) | -179.66(1) | -179.12(1) | -178.71(1) | -172.53(1) |

<sup>a</sup> van der Waals radii used for calculations:  $r_{vdw}(Cl)$  1.75Å,  $r_{vdw}(Br)$  1.85Å,  $r_{vdw}(I)$  1.98Å,<sup>21</sup> <sup>b</sup> Splay angle:  $\Sigma$  of the three bay region angles – 360.

**Table S8:** Crystallographic data for compounds **A1-A4**.

|                                       | <b>A1</b>                                                                                                                  | <b>A2</b>                                                                                                                         | <b>A3</b>                                              | <b>A4</b>                                                                       |
|---------------------------------------|----------------------------------------------------------------------------------------------------------------------------|-----------------------------------------------------------------------------------------------------------------------------------|--------------------------------------------------------|---------------------------------------------------------------------------------|
| Empirical Formula                     | C <sub>18</sub> H <sub>13</sub> BrS                                                                                        | C <sub>18</sub> H <sub>13</sub> BrSe                                                                                              | C <sub>18</sub> H <sub>13</sub> BrTe                   | C <sub>18</sub> H <sub>13</sub> IS                                              |
| Formula Weight                        | 341.26                                                                                                                     | 388.16                                                                                                                            | 436.80                                                 | 388.27                                                                          |
| Temperature (°C)                      | -148(1)                                                                                                                    | -148(1)                                                                                                                           | -148(1)                                                | -148(1)                                                                         |
| Crystal Colour, Habit                 | colourless, platelet                                                                                                       | colourless, prism                                                                                                                 | yellow, platelet                                       | colourless, platelet                                                            |
| Crystal Dimensions (mm <sup>3</sup> ) | 0.15 X 0.09 X 0.02                                                                                                         | 0.20 X 0.20 X 0.20                                                                                                                | 0.12 X 0.03 X 0.03                                     | 0.15 X 0.15 X 0.02                                                              |
| Crystal System                        | triclinic                                                                                                                  | triclinic                                                                                                                         | orthorhombic                                           | monoclinic                                                                      |
| Lattice Parameters                    | a = 7.400(5) Å<br>b = 9.253(6) Å<br>c = 10.744(6) Å<br>$\alpha$ = 79.67(4)°<br>$\beta$ = 77.28(4)°<br>$\gamma$ = 87.54(5)° | a = 5.645(3) Å<br>b = 11.096(5) Å<br>c = 11.508(5) Å<br>$\alpha$ = 97.849(11)°<br>$\beta$ = 95.044(11)°<br>$\gamma$ = 97.960(13)° | a = 5.8486(17) Å<br>b = 21.983(7) Å<br>c = 22.637(6) Å | a = 5.109(4) Å<br>b = 15.850(12) Å<br>c = 17.810(14) Å<br>$\beta$ = 93.721(19)° |
| Volume (Å <sup>3</sup> )              | V = 705.9(8)                                                                                                               | V = 703.0(6)                                                                                                                      | V = 2910.4(14)                                         | V = 1439.0(19)                                                                  |
| Space Group                           | P-1                                                                                                                        | P-1                                                                                                                               | Pbca                                                   | P2 <sub>1</sub> /c                                                              |

|                                                 |                         |                         |                         |                         |
|-------------------------------------------------|-------------------------|-------------------------|-------------------------|-------------------------|
| Z value                                         | 2                       | 2                       | 8                       | 4                       |
| Dcalc (g/cm <sup>3</sup> )                      | 1.605                   | 1.834                   | 1.994                   | 1.792                   |
| F000                                            | 344                     | 380                     | 1664                    | 760                     |
| $\mu(\text{MoK}\alpha)$ (cm <sup>-1</sup> )     | 30.531                  | 55.071                  | 47.845                  | 23.571                  |
| No. of Reflections Measured                     | 5704                    | 6071                    | 21021                   | 11043                   |
| Rint                                            | 0.0574                  | 0.0298                  | 0.0744                  | 0.1431                  |
| Min and Max Transmissions                       | 0.464 - 0.941           | 0.220 - 0.332           | 0.525 - 0.866           | 0.192 - 0.954           |
| Independ. Reflection (No. Variables)            | 2790(181)               | 3040(181)               | 2908(181)               | 3262(181)               |
| Reflection/Parameter Ratio                      | 15.41                   | 16.80                   | 16.07                   | 18.02                   |
| Residuals: R <sub>1</sub> (I>2.00 $\sigma$ (I)) | 0.0716                  | 0.0456                  | 0.0703                  | 0.1043                  |
| Residuals: R (All reflections)                  | 0.0903                  | 0.0579                  | 0.1047                  | 0.1361                  |
| Residuals: wR <sub>2</sub> (All reflections)    | 0.2237                  | 0.1876                  | 0.2862                  | 0.3414                  |
| Goodness of Fit Indicator                       | 1.181                   | 1.197                   | 1.284                   | 1.141                   |
| Flack Parameter                                 | -                       | -                       | -                       | -                       |
| Maximum peak in Final Diff. Map                 | 0.58 e-/Å <sup>3</sup>  | 1.46 e-/Å <sup>3</sup>  | 2.42 e-/Å <sup>3</sup>  | 1.88 e-/Å <sup>3</sup>  |
| Minimum peak in Final Diff. Map                 | -0.82 e-/Å <sup>3</sup> | -1.53 e-/Å <sup>3</sup> | -3.79 e-/Å <sup>3</sup> | -3.17 e-/Å <sup>3</sup> |

**Table S9:** Crystallographic data for compounds **A5-A6**.

|                                                 | <b>A5</b>                                                                          | <b>A6</b>                                                                          | <b>A7</b>                                                                           | <b>A8</b>                                                             |
|-------------------------------------------------|------------------------------------------------------------------------------------|------------------------------------------------------------------------------------|-------------------------------------------------------------------------------------|-----------------------------------------------------------------------|
| Empirical Formula                               | C <sub>18</sub> H <sub>13</sub> ISe                                                | C <sub>18</sub> H <sub>13</sub> ITe                                                | C <sub>24</sub> H <sub>18</sub> S <sub>2</sub>                                      | C <sub>24</sub> H <sub>18</sub> Se <sub>2</sub>                       |
| Formula Weight                                  | 435.17                                                                             | 483.81                                                                             | 370.53                                                                              | 464.33                                                                |
| Temperature (°C)                                | -148(1)                                                                            | -148(1)                                                                            | -148(1)                                                                             | -180(1)                                                               |
| Crystal Colour, Habit                           | colourless, prism                                                                  | yellow, plate                                                                      | colourless, platelet                                                                | colourless, platelet                                                  |
| Crystal Dimensions (mm <sup>3</sup> )           | 0.09 X 0.09 X 0.03                                                                 | 0.27 X 0.03 X 0.02                                                                 | 0.18 X 0.09 X 0.03                                                                  | 0.20 X 0.10 X 0.01                                                    |
| Crystal System                                  | monoclinic                                                                         | monoclinic                                                                         | monoclinic                                                                          | orthorhombic                                                          |
| Lattice Parameters                              | a = 7.3312(19) Å<br>b = 10.845(3) Å<br>c = 18.220(5) Å<br>-<br>β = 95.673(8)°<br>- | a = 5.9391(18) Å<br>b = 22.301(6) Å<br>c = 22.556(6) Å<br>-<br>β = 90.069(9)°<br>- | a = 11.794(6) Å<br>b = 10.806(6) Å<br>c = 28.856(17) Å<br>-<br>β = 93.435(15)°<br>- | a = 22.1470(15) Å<br>b = 5.221(4) Å<br>c = 15.829(6) Å<br>-<br>-<br>- |
| Volume (Å <sup>3</sup> )                        | V = 1441.5(6)                                                                      | V = 2987.5(15)                                                                     | V = 3671(4)                                                                         | V = 1830.3(15)                                                        |
| Space Group                                     | P2 <sub>1</sub> /c                                                                 | P2 <sub>1</sub> /c                                                                 | Cc                                                                                  | Pca2 <sub>1</sub>                                                     |
| Z value                                         | 4                                                                                  | 8                                                                                  | 8                                                                                   | 4                                                                     |
| Dcalc (g/cm <sup>3</sup> )                      | 2.005                                                                              | 2.151                                                                              | 1.341                                                                               | 1.685                                                                 |
| F000                                            | 832                                                                                | 1808                                                                               | 1552                                                                                | 920                                                                   |
| $\mu(\text{MoK}\alpha)$ (cm <sup>-1</sup> )     | 47.340                                                                             | 40.460                                                                             | 2.943                                                                               | 40.454                                                                |
| No. of Reflections Measured                     | 11619                                                                              | 25496                                                                              | 13181                                                                               | 10530                                                                 |
| Rint                                            | 0.0665                                                                             | 0.0779                                                                             | 0.1058                                                                              | 0.0591                                                                |
| Min and Max Transmissions                       | 0.518 - 0.868                                                                      | 0.509 - 0.922                                                                      | 0.364 - 0.991                                                                       | 0.656 - 0.960                                                         |
| Independ. Reflection (No. Variables)            | 2926(181)                                                                          | 6960(361)                                                                          | 6408(469)                                                                           | 3200(235)                                                             |
| Reflection/Parameter Ratio                      | 16.17                                                                              | 19.28                                                                              | 13.66                                                                               | 13.62                                                                 |
| Residuals: R <sub>1</sub> (I>2.00 $\sigma$ (I)) | 0.0511                                                                             | 0.0953                                                                             | 0.1115                                                                              | 0.0406                                                                |
| Residuals: R (All reflections)                  | 0.0694                                                                             | 0.1276                                                                             | 0.1540                                                                              | 0.0943                                                                |
| Residuals: wR <sub>2</sub> (All reflections)    | 0.1582                                                                             | 0.3271                                                                             | 0.3075                                                                              | 0.1333                                                                |
| Goodness of Fit Indicator                       | 1.264                                                                              | 1.260                                                                              | 1.063                                                                               | 0.765                                                                 |
| Flack Parameter                                 | -                                                                                  | -                                                                                  | -                                                                                   | 0.011(18)                                                             |
| Maximum peak in Final Diff. Map                 | 1.70 e-/Å <sup>3</sup>                                                             | 2.79 e-/Å <sup>3</sup>                                                             | 0.80 e-/Å <sup>3</sup>                                                              | 0.59 e-/Å <sup>3</sup>                                                |
| Minimum peak in Final Diff. Map                 | -2.00 e-/Å <sup>3</sup>                                                            | -3.55 e-/Å <sup>3</sup>                                                            | -0.74 e-/Å <sup>3</sup>                                                             | -0.67 e-/Å <sup>3</sup>                                               |

5

**Table S10:** Crystallographic data for compounds **A9-A12**.

|                   | <b>A9</b>                                       | <b>A10</b>                          | <b>A11</b>                          | <b>A12</b>                           |
|-------------------|-------------------------------------------------|-------------------------------------|-------------------------------------|--------------------------------------|
| Empirical Formula | C <sub>24</sub> H <sub>18</sub> Te <sub>2</sub> | C <sub>24</sub> H <sub>18</sub> SSe | C <sub>24</sub> H <sub>18</sub> STe | C <sub>24</sub> H <sub>18</sub> SeTe |
| Formula Weight    | 561.61                                          | 417.43                              | 466.07                              | 512.97                               |

|                                              |                                                                                     |                                                                                    |                                                                       |                                                                                     |
|----------------------------------------------|-------------------------------------------------------------------------------------|------------------------------------------------------------------------------------|-----------------------------------------------------------------------|-------------------------------------------------------------------------------------|
| Temperature (°C)                             | -148(1)                                                                             | -148(1)                                                                            | -180(1)                                                               | -148(1)                                                                             |
| Crystal Colour, Habit                        | yellow, platelet                                                                    | colourless, platelet                                                               | colourless, prism                                                     | colourless, prism                                                                   |
| Crystal Dimensions (mm <sup>3</sup> )        | 0.12 X 0.09 X 0.03                                                                  | 0.24 X 0.02 X 0.03                                                                 | 0.12 X 0.03 X 0.03                                                    | 0.20 X 0.20 X 0.20                                                                  |
| Crystal System                               | monoclinic                                                                          | monoclinic                                                                         | orthorhombic                                                          | monoclinic                                                                          |
| Lattice Parameters                           | a = 10.050(6) Å<br>b = 21.750(11) Å<br>c = 9.843(5) Å<br>-<br>β = 116.242(12)°<br>- | a = 5.606(4) Å<br>b = 16.173(9) Å<br>c = 20.919(13) Å<br>-<br>β = 97.126(14)°<br>- | a = 22.326(3) Å<br>b = 5.272(10) Å<br>c = 15.640(14) Å<br>-<br>-<br>- | a = 5.641(2) Å<br>b = 22.249(10) Å<br>c = 15.272(7) Å<br>-<br>β = 100.477(18)°<br>- |
| Volume (Å <sup>3</sup> )                     | V = 1929.8(19)                                                                      | V = 1881.8(19)                                                                     | V = 1841(4)                                                           | V = 1884.7(14)                                                                      |
| Space Group                                  | P2 <sub>1</sub> /c                                                                  | P2 <sub>1</sub> /n                                                                 | Pca2 <sub>1</sub>                                                     | P2 <sub>1</sub> /n                                                                  |
| Z value                                      | 4                                                                                   | 4                                                                                  | 4                                                                     | 4                                                                                   |
| Dcalc (g/cm <sup>3</sup> )                   | 1.933                                                                               | 1.473                                                                              | 1.681                                                                 | 1.808                                                                               |
| F000                                         | 1064                                                                                | 848                                                                                | 920                                                                   | 992                                                                                 |
| μ(MoKα) (cm <sup>-1</sup> )                  | 30.281                                                                              | 21.108                                                                             | 17.338                                                                | 35.146                                                                              |
| No. of Reflections Measured                  | 15461                                                                               | 16208                                                                              | 17293                                                                 | 16286                                                                               |
| R <sub>int</sub>                             | 0.1036                                                                              | 0.1434                                                                             | 0.0682                                                                | 0.1052                                                                              |
| Min and Max Transmissions                    | 0.298 - 0.913                                                                       | 0.484 - 0.959                                                                      | 0.558 - 0.949                                                         | 0.299 - 0.495                                                                       |
| Independ. Reflection (No. Variables)         | 4448(235)                                                                           | 4381 (235)                                                                         | 3322 (235)                                                            | 4318(235)                                                                           |
| Reflection/Parameter Ratio                   | 18.93                                                                               | 18.64                                                                              | 14.14                                                                 | 18.37                                                                               |
| Residuals: R <sub>1</sub> (I > 2.00σ(I))     | 0.0948                                                                              | 0.1324                                                                             | 0.0409                                                                | 0.0835                                                                              |
| Residuals: R (All reflections)               | 0.1393                                                                              | 0.1948                                                                             | 0.0430                                                                | 0.1251                                                                              |
| Residuals: wR <sub>2</sub> (All reflections) | 0.3803                                                                              | 0.3364                                                                             | 0.0985                                                                | 0.2644                                                                              |
| Goodness of Fit Indicator                    | 1.421                                                                               | 1.218                                                                              | 1.084                                                                 | 1.148                                                                               |
| Flack Parameter                              | -                                                                                   | -                                                                                  | -0.01(4)                                                              | -                                                                                   |
| Maximum peak in Final Diff. Map              | 2.90 e-/Å <sup>3</sup>                                                              | 0.73 e-/Å <sup>3</sup>                                                             | 1.58 e-/Å <sup>3</sup>                                                | 1.38 e-/Å <sup>3</sup>                                                              |
| Minimum peak in Final Diff. Map              | -4.99 e-/Å <sup>3</sup>                                                             | -1.16 e-/Å <sup>3</sup>                                                            | -1.39 e-/Å <sup>3</sup>                                               | -2.35 e-/Å <sup>3</sup>                                                             |

**Table S11:** Crystallographic data for compounds **A14-A16**.

|                                       | <b>A14</b>                                                                        | <b>A15</b>                                                                        | <b>A16</b>                                                                                                  |
|---------------------------------------|-----------------------------------------------------------------------------------|-----------------------------------------------------------------------------------|-------------------------------------------------------------------------------------------------------------|
| Empirical Formula                     | C <sub>12</sub> H <sub>8</sub> I <sub>2</sub>                                     | C <sub>12</sub> H <sub>8</sub> BrI                                                | C <sub>12</sub> H <sub>8</sub> Cl <sub>2</sub>                                                              |
| Formula Weight                        | 406.00                                                                            | 359.00                                                                            | 223.10                                                                                                      |
| Temperature (°C)                      | -148(1)                                                                           | -148(1)                                                                           | -148(1)                                                                                                     |
| Crystal Colour, Habit                 | colourless, prism                                                                 | colourless, platelet                                                              | colourless, prism                                                                                           |
| Crystal Dimensions (mm <sup>3</sup> ) | 0.20 X 0.20 X 0.20                                                                | 0.15 X 0.12 X 0.03                                                                | 0.37 X 0.12 X 0.10                                                                                          |
| Crystal System                        | monoclinic                                                                        | monoclinic                                                                        | triclinic                                                                                                   |
| Lattice Parameters                    | a = 8.062(3) Å<br>b = 11.733(4) Å<br>c = 11.966(4) Å<br>-<br>β = 107.480(8)°<br>- | a = 7.912(3) Å<br>b = 11.715(5) Å<br>c = 11.771(5) Å<br>-<br>β = 107.423(9)°<br>- | a = 7.6529(7) Å<br>b = 8.2912(8) Å<br>c = 8.8382(8) Å<br>α = 64.174(2)°<br>β = 78.781(2)°<br>γ = 69.709(2)° |
| Volume (Å <sup>3</sup> )              | V = 1079.6(6)                                                                     | V = 1041.0(8)                                                                     | V = 472.83(8)                                                                                               |
| Space Group                           | P2 <sub>1</sub> /n                                                                | P2 <sub>1</sub> /n                                                                | P-1                                                                                                         |
| Z value                               | 4                                                                                 | 4                                                                                 | 2                                                                                                           |
| Dcalc (g/cm <sup>3</sup> )            | 2.498                                                                             | 2.290                                                                             | 1.567                                                                                                       |
| F000                                  | 744                                                                               | 672                                                                               | 228                                                                                                         |

|                                              |                                |                                |                                |
|----------------------------------------------|--------------------------------|--------------------------------|--------------------------------|
| $\mu(\text{MoK}\alpha)$ ( $\text{cm}^{-1}$ ) | 57.831                         | 68.804                         | 6.330                          |
| No. of Reflections Measured                  | 8943                           | 8650                           | 4081                           |
| Rint                                         | 0.0337                         | 0.0382                         | 0.0256                         |
| Min and Max Transmissions                    | 0.235 - 0.315                  | 0.492 - 0.813                  | 0.821 - 0.939                  |
| Independ. Reflection (No. Variables)         | 2471(127)                      | 2412(127)                      | 1663(127)                      |
| Reflection/Parameter Ratio                   | 19.46                          | 18.99                          | 13.09                          |
| Residuals: $R_1$ ( $I > 2.00\sigma(I)$ )     | 0.0421                         | 0.1031                         | 0.0384                         |
| Residuals: $R$ (All reflections)             | 0.0549                         | 0.1121                         | 0.0506                         |
| Residuals: $wR_2$ (All reflections)          | 0.1786                         | 0.3718                         | 0.0853                         |
| Goodness of Fit Indicator                    | 1.201                          | 1.735                          | 1.168                          |
| Flack Parameter                              | -                              | -                              | -                              |
| Maximum peak in Final Diff. Map              | $3.04 \text{ e}/\text{\AA}^3$  | $8.24 \text{ e}/\text{\AA}^3$  | $0.27 \text{ e}/\text{\AA}^3$  |
| Minimum peak in Final Diff. Map              | $-2.94 \text{ e}/\text{\AA}^3$ | $-3.49 \text{ e}/\text{\AA}^3$ | $-0.27 \text{ e}/\text{\AA}^3$ |

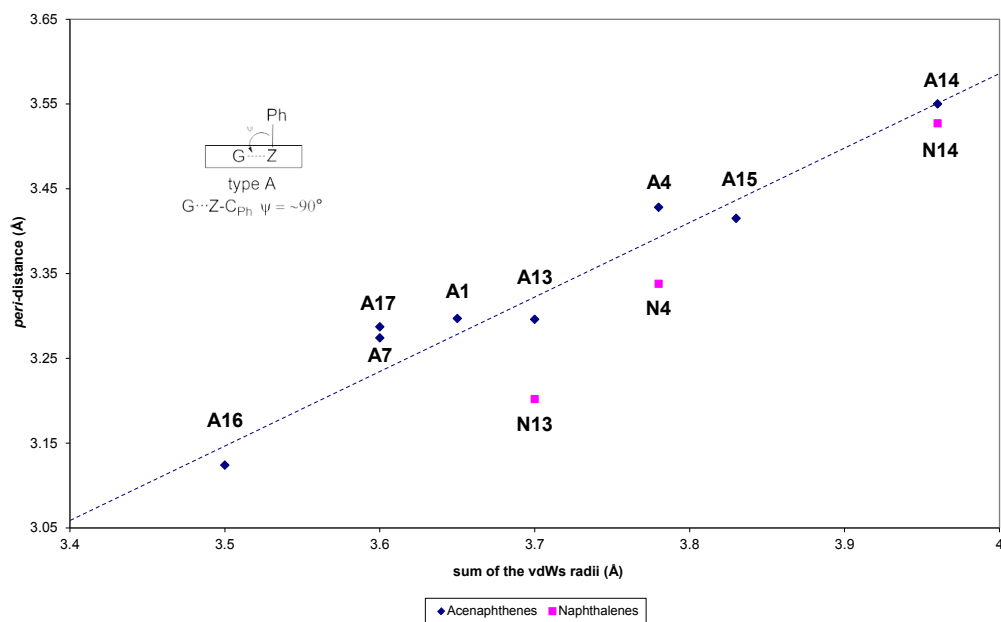

Fig. S9 The relationship between heteroatom size (sum of van der Waals radii) versus *peri*-distance in compounds adopting type A/AA conformations and bis-halides.

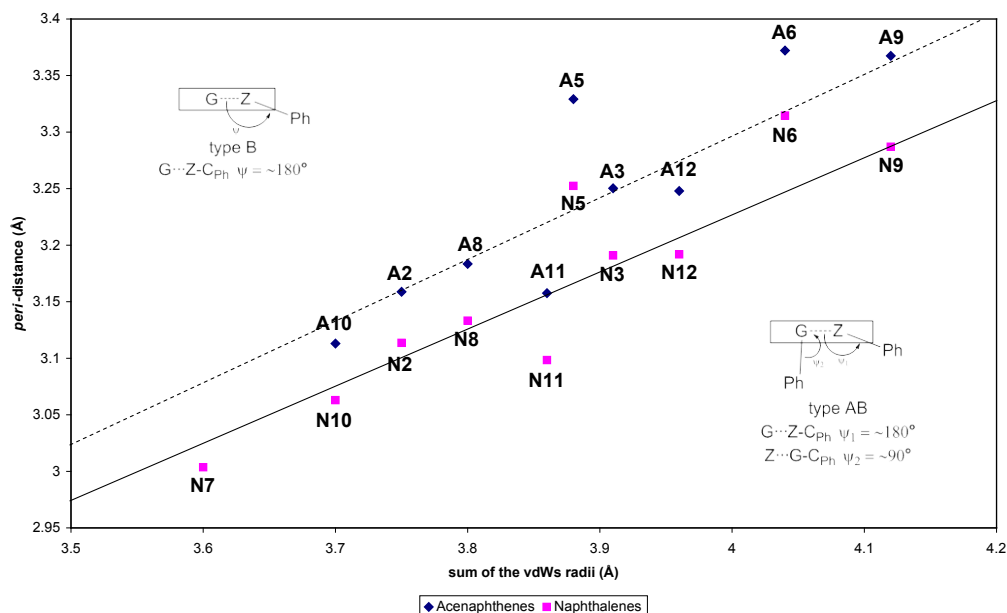

**Fig. S10** The relationship between heteroatom size (sum of van der Waals radii) versus *peri*-distance in compounds adopting type B/AB conformations.

## 4. References

- N. Tanaka and T. Kasai, *Bull. Chem. Soc. Jpn.*, 1981, **54**, 3020-3025.
- Y. Aso, K. Yui, T. Miyoshi and T. Otsubo, *Bull. Chem. Soc. Jpn.*, 1988, **61**, 2013-2018.
- W. D. Neudorff, D. Lentz, M. Anibarro and A. D. Schlüter, *Chem. Eur. J.*, 2003, **9**, 2745-2757.
- A. D. Becke, *J. Chem. Phys.*, 1993, **98**, 5648-5652; C. Lee, W. Yang and R. G. Parr, *Phys. Rev. B*, 1988, **37**, 785-789.
- R. C. Binning and L. A. Curtiss, *J. Comput. Chem.*, 1990, **11**, 1206-1216.
- P. Schwerdtfeger, M. Dolg, W. H. E. Schwarz, G. A. Bowmaker and P. D. W. Boyd, *J. Chem. Phys.*, 1989, **91**, 1762-1774; A. Bergner, M. Dolg, W. Kuechle, H. Stoll and H. Preuss, *Mol. Phys.*, 1993, **80**, 1431-1441; for I the valence basis by Kaupp et al. (including diffuse functions) was employed: M. Kaupp, P. v. R. Schleyer, H. Stoll and H. Preuss, *J. Am. Chem. Soc.*, 1991, **113**, 6012-6020.
- S. Huzinaga, J. Anzelm, M. Klobukowski, E. Radzio-Andzelm, Y. Sakai and H. Tatewaki, in: *Gaussian Basis Sets for Molecular Calculations*, Elsevier, Amsterdam, 1984.
- K. B. Wiberg, *Tetrahedron*, 1968, **24**, 1083-1096.
- A. E. Reed, F. Curtiss and L. A. F. Weinhold, *Chem. Rev.*, 1988, **88**, 899-926.
- M. J. Frisch, G. W. Trucks, H. B. Schlegel, G. E. Scuseria, M. A. Robb, J. R. Cheeseman, J. A. Montgomery, Jr., T. Vreven, K. N. Kudin, J. C. Burant, J. M. Millam, S. S. Iyengar, J. Tomasi, V. Barone, B. Mennucci, M. Cossi, G. Scalmani, N. Rega, G. A. Petersson, H. Nakatsuji, M. Hada, M. Ehara, K. Toyota, R. Fukuda, J. Hasegawa, M. Ishida, T. Nakajima, Y. Honda, O. Kitao, H. Nakai, M. Klene, X. Li, J. E. Knox, H. P. Hratchian, J. B. Cross, V. Bakken, C. Adamo, J. Jaramillo, R. Gomperts, R. E. Stratmann, O. Yazyev, A. J. Austin, R. Cammi, C. Pomelli, J. W. Ochterski, P. Y. Ayala, K. Morokuma, G. A. Voth, P. Salvador, J. J. Dannenberg, V. G. Zakrzewski, S. Dapprich, A. D. Daniels, M. C. Strain, O. Farkas, D. K. Malick, A. D. Rabuck, K. Raghavachari, J. B. Foresman, J. V. Ortiz, Q. Cui, A. G. Baboul, S. Clifford, J. Cioslowski, B. B. Stefanov, G. Liu, A. Liashenko, P. Piskorz, I. Komaromi, R. L. Martin, D. J. Fox, T. Keith, M. A. Al-Laham, C. Y. Peng, A. Nanayakkara, M. Challacombe, P. M. W. Gill, B. Johnson, W. Chen, M. W. Wong, C. Gonzalez and J. A. Pople, Gaussian 03, Revision E.01, Gaussian, Inc., Wallingford CT, 2004.
- J. Autschbach, T. Ziegler, *J. Chem. Phys.* **2000**, **113**, 936; J. Autschbach, *J. Chem. Phys.* **2008**, **129**, 094105.
- A. D. Becke, *Phys. Rev. A* **1988**, **38**, 3098-3100; J. P. Perdew, *Phys. Rev. B* **1986**, **33**, 8822; J. P. Perdew, *Phys. Rev. B* **1986**, **34**, 7406.
- E. van Lenthe, E. J. Baerends, J. G. Snijders, *J. Chem. Phys.* **1994**, **101**, 9783; E. van Lenthe, R. van Leeuwen, E. J. Baerends, J. G. Snijders, *Int. J. Quantum Chem.* **1996**, **57**, 281-293; E. van Lenthe, E. J. Baerends, J. G. Snijders, *J. Chem. Phys.* **1993**, **99**, 4597.
- E. van Lenthe, J. G. Snijders, E. J. Baerends, *J. Chem. Phys.* **1996**, **105**, 6505.
- E. J. Baerends, D. E. Ellis, P. Ros, *Chem. Phys.* **1973**, **2**, 41; G. te Velde, E. J. Baerends, *J. Comput. Phys.* **1992**, **99**, 84; G. te Velde, F. M. Bickelhaupt, E. J. Baerends, C. Fonseca Guerra, S. J. A. van Gisbergen, J. G. Snijders, T. Ziegler, *J. Comput. Chem.* **2001**, **22**, 931
- E. J. Baerends, T. Ziegler, J. Autschbach, D. Bashford, A. Bérces, F. M. Bickelhaupt, C. Bo, P. M. Boerrigter, L. Cavallo, D. P. Chong, L. Deng, R. M. Dickson, D. E. Ellis, M. van Faassen, L. Fan, T. H. Fischer, C. Fonseca Guerra, A. Ghysels, A. Giammona, S. J. A. van Gisbergen, A. W. Götz, J. A. Groeneveld, O. V. Gritsenko, M. Grüning, S. Gusarov, F. E. Harris, P. van den Hoek, C. R. Jacob, H. Jacobsen, L. Jensen, J. W. Kaminski, G. van Kessel, F. Kootstra, A. Kovalenko, M. V. Krykunov, E. van Lenthe, D. A. McCormack, A. Michalak, M. Mitoraj, J. Neugebauer, V. P. Nicu, L. Noodleman, V. P. Osinga, S. Patchkovskii, P. H. T. Philipsen, D. Post, C. C. Pye, W. Ravenek, J. I. Rodríguez, P. Ros, P. R. T. Schipper, G. Schreckenbach, J. S. Seldenthuis, M. Seth, J. G. Snijders, M. Solà, M. Swart, D. Swerhone, G. te Velde, P. Vernooijs, L. Versluis, L. Visscher, O. Visser, F. Wang, T. A. Wesolowski, E. M. van Wezenbeek, G. Wiesenekker, S. K. Wolff, T. K. Woo, A. L. Yakovlev, ADF2010.02, SCM, Theoretical Chemistry, Vrije Universiteit, Amsterdam, The Netherlands, <http://www.scm.com>.

- <sup>17</sup> A. L. Fuller, L. A. S. Scott-Hayward, Y. Li, M. Bühl, A. M. Z. Slawin and J. D. Woollins, *J. Am. Chem. Soc.*, 2010, **132**, 5799–5802.
- <sup>18</sup> CrystalClear 2.0: Rigaku Corporation, 2010. CrystalClear Software User's Guide, Molecular Structure Corporation, © 2000. J. W. P. Flugrath, *Acta Crystallogr., Sect. D*, 1999, **D55**, 1718-1725.
- <sup>19</sup> CrystalStructure 4.0: Crystal Structure Analysis Package, Rigaku and Rigaku/MS (2009). 9009 New Trails Dr., The Woodlands, TX 77381, USA.
- <sup>20</sup> SHELX97: G. M. Sheldrick, *Acta Crystallogr., Sect. A*, 2008, **64**, 112.
- <sup>21</sup> A. Bondi, *J. Phys. Chem.*, 1964, **68**, 441-451.
- <sup>22</sup> N. Jaiboon, *J. Sci. Soc. Thailand*, 2002, **28**, 271-275.
- <sup>23</sup> R. L. Avoyan, and Yu. T. Struchkov, *Zh. Strukt. Khim.*, 1964, **5**, 407-419.
